# Supplementary material
Source: PubMed Central journal article supplement (PMC10226406)
Supplement: PR72_235_tableS1.pdf [file PR72_235_tableS1.pdf]

**Table S1.** Common target information for Irisin and UC

| <b>Protein names</b>                                        | <b>Gene name</b> | <b>Uniprot ID</b> |
|-------------------------------------------------------------|------------------|-------------------|
| TNF-alpha                                                   | TNF              | P01375            |
| Interleukin-2                                               | IL2              | P60568            |
| Xanthine dehydrogenase                                      | XDH              | P47989            |
| Carbonic anhydrase I                                        | CA1              | P00915            |
| Transforming protein p21/H-Ras-1                            | HRAS             | P01112            |
| Adenosine A3 receptor                                       | ADORA3           | P0DMS8            |
| 6-O-methylguanine-DNA methyltransferase                     | MGMT             | P16455            |
| Leukocyte adhesion glycoprotein LFA-1 alpha                 | ITGAL            | P20701            |
| Alpha-2a adrenergic receptor                                | ADRA2A           | P08913            |
| Acetylcholinesterase                                        | ACHE             | P22303            |
| Hydroxycarboxylic acid receptor 2                           | HCAR2            | Q8TDS4            |
| Matrix metalloproteinase 2                                  | MMP2             | P08253            |
| Matrix metalloproteinase 12                                 | MMP12            | P39900            |
| Carbonic anhydrase II                                       | CA2              | P00918            |
| Serine/threonine-protein kinase Aurora-A                    | AURKA            | O14965            |
| MAP kinase p38 alpha                                        | MAPK14           | Q16539            |
| Protein kinase C delta                                      | PRKCD            | Q05655            |
| Protein kinase C beta                                       | PRKCB            | P05771            |
| G-protein coupled receptor 55                               | GPR55            | Q9Y2T6            |
| P-glycoprotein 1                                            | ABCB1            | P08183            |
| T-cell protein-tyrosine phosphatase                         | PTPN2            | P17706            |
| Heat shock protein HSP 90-alpha                             | HSP90AA1         | P07900            |
| Caspase-3                                                   | CASP3            | P42574            |
| Tyrosine-protein kinase SRC                                 | SRC              | P12931            |
| Galectin-3                                                  | LGALS3           | P17931            |
| Galectin-1                                                  | LGALS1           | P09382            |
| Galectin-9                                                  | LGALS9           | O00182            |
| Lymphocyte differentiation antigen CD38                     | CD38             | P28907            |
| Matrix metalloproteinase 13                                 | MMP13            | P45452            |
| Matrix metalloproteinase 9                                  | MMP9             | P14780            |
| Matrix metalloproteinase 8                                  | MMP8             | P22894            |
| Hepatocyte growth factor receptor                           | MET              | P08581            |
| Thymidylate synthase (by homology)                          | TYMS             | P04818            |
| Cyclooxygenase-2                                            | PTGS2            | P35354            |
| Peroxisome proliferator-activated receptor gamma            | PPARG            | P37231            |
| Kinesin-1 heavy chain/ Tyrosine-protein kinase receptor RET | RET              | P07949            |
| Hematopoietic cell protein-tyrosine phosphatase 70Z-PEP     | PTPN22           | Q9Y2R2            |
| Thymidine phosphorylase                                     | TYMP             | P19971            |
| PI3-kinase p110-gamma subunit                               | PIK3CG           | P48736            |
| Fibronectin                                                 | FN1              | P02751            |
| PI3-kinase p110-alpha subunit                               | PIK3CA           | P42336            |
| Galectin-4                                                  | LGALS4           | P56470            |
| Vascular endothelial growth factor receptor 2               | KDR              | P35968            |
| Prostate specific antigen                                   | KLK3             | P07288            |

|                                                   |         |        |
|---------------------------------------------------|---------|--------|
| Serum albumin                                     | ALB     | P02768 |
| Mitogen-activated protein kinase kinase kinase 14 | MAP3K14 | Q99558 |
| Dihydrofolate reductase (by homology)             | DHFR    | P00374 |
| Receptor-type tyrosine-protein phosphatase S      | PTPRS   | Q13332 |
| Cyclooxygenase-1                                  | PTGS1   | P23219 |
| Toll-like receptor (TLR7/TLR9)                    | TLR9    | Q9NR96 |
| Arachidonate 5-lipoxygenase                       | ALOX5   | P09917 |

---
