# Supplementary material
Source: PubMed Central journal article supplement (PMC10226406)
Supplement: PR72_235_tableS2.pdf [file PR72_235_tableS2.pdf]

**Table S2.** Information on the PPI network

| node1  | node2    | node1 acce | node2 acce | node1 annotation                         | node2 annotation                          | score |
|--------|----------|------------|------------|------------------------------------------|-------------------------------------------|-------|
| ABCB1  | ALB      | ENSP00000  | ENSP00000  | Multidrug resistance protein 1; Energy-  | Serum albumin; Serum albumin, the mai     | 0.596 |
| ABCB1  | CASP3    | ENSP00000  | ENSP00000  | Multidrug resistance protein 1; Energy-  | Caspase-3; Involved in the activation cas | 0.566 |
| ABCB1  | DHFR     | ENSP00000  | ENSP00000  | Multidrug resistance protein 1; Energy-  | Dihydrofolate reductase; Key enzyme in f  | 0.485 |
| ABCB1  | FN1      | ENSP00000  | ENSP00000  | Multidrug resistance protein 1; Energy-  | Fibronectin 1; Fibronectin type III domai | 0.489 |
| ABCB1  | HRAS     | ENSP00000  | ENSP00000  | Multidrug resistance protein 1; Energy-  | GTPase HRas; Involved in the activation   | 0.417 |
| ABCB1  | HSP90AA1 | ENSP00000  | ENSP00000  | Multidrug resistance protein 1; Energy-  | Heat shock protein HSP 90-alpha; Molec    | 0.427 |
| ABCB1  | KDR      | ENSP00000  | ENSP00000  | Multidrug resistance protein 1; Energy-  | Vascular endothelial growth factor recep  | 0.404 |
| ABCB1  | MGMT     | ENSP00000  | ENSP00000  | Multidrug resistance protein 1; Energy-  | Methylated-dna-[protein]-cysteine s-m     | 0.457 |
| ABCB1  | PTGS2    | ENSP00000  | ENSP00000  | Multidrug resistance protein 1; Energy-  | Prostaglandin G/H synthase 2; Converts    | 0.426 |
| ABCB1  | SRC      | ENSP00000  | ENSP00000  | Multidrug resistance protein 1; Energy-  | Proto-oncogene tyrosine-protein kinase    | 0.407 |
| ABCB1  | TNF      | ENSP00000  | ENSP00000  | Multidrug resistance protein 1; Energy-  | Tumor necrosis factor; Cytokine that bin  | 0.455 |
| ABCB1  | TYMS     | ENSP00000  | ENSP00000  | Multidrug resistance protein 1; Energy-  | Thymidylate synthetase; Thymidylate syn   | 0.618 |
| ACHE   | ALB      | ENSP00000  | ENSP00000  | Acetylcholinesterase (cartwright blood g | Serum albumin; Serum albumin, the mai     | 0.814 |
| ACHE   | CA1      | ENSP00000  | ENSP00000  | Acetylcholinesterase (cartwright blood g | Carbonic anhydrase 1; Reversible hydrati  | 0.563 |
| ACHE   | CASP3    | ENSP00000  | ENSP00000  | Acetylcholinesterase (cartwright blood g | Caspase-3; Involved in the activation cas | 0.53  |
| ACHE   | FN1      | ENSP00000  | ENSP00000  | Acetylcholinesterase (cartwright blood g | Fibronectin 1; Fibronectin type III domai | 0.529 |
| ACHE   | PTGS2    | ENSP00000  | ENSP00000  | Acetylcholinesterase (cartwright blood g | Prostaglandin G/H synthase 2; Converts    | 0.477 |
| ACHE   | TNF      | ENSP00000  | ENSP00000  | Acetylcholinesterase (cartwright blood g | Tumor necrosis factor; Cytokine that bin  | 0.521 |
| ADORA3 | ALB      | ENSP00000  | ENSP00000  | Transmembrane domain-containing pr       | Serum albumin; Serum albumin, the mai     | 0.408 |
| ADORA3 | KDR      | ENSP00000  | ENSP00000  | Transmembrane domain-containing pr       | Vascular endothelial growth factor recep  | 0.439 |
| ADORA3 | MAP3K14  | ENSP00000  | ENSP00000  | Transmembrane domain-containing pr       | Mitogen-activated protein kinase kinase   | 0.569 |
| ADORA3 | TNF      | ENSP00000  | ENSP00000  | Transmembrane domain-containing pr       | Tumor necrosis factor; Cytokine that bin  | 0.53  |
| ADRA2A | PRKCB    | ENSP00000  | ENSP00000  | Alpha-2A adrenergic receptor; Alpha-2    | Protein kinase C beta type; Calcium-acti  | 0.663 |
| ADRA2A | PRKCD    | ENSP00000  | ENSP00000  | Alpha-2A adrenergic receptor; Alpha-2    | Protein kinase C delta type; Calcium-ind  | 0.732 |
| ALB    | ABCB1    | ENSP00000  | ENSP00000  | Serum albumin; Serum albumin, the ma     | Multidrug resistance protein 1; Energy-d  | 0.596 |
| ALB    | ACHE     | ENSP00000  | ENSP00000  | Serum albumin; Serum albumin, the ma     | Acetylcholinesterase (cartwright blood g  | 0.814 |
| ALB    | ADORA3   | ENSP00000  | ENSP00000  | Serum albumin; Serum albumin, the ma     | Transmembrane domain-containing pro       | 0.408 |
| ALB    | CA1      | ENSP00000  | ENSP00000  | Serum albumin; Serum albumin, the ma     | Carbonic anhydrase 1; Reversible hydrati  | 0.467 |

|       |          |           |           |                                        |                                            |       |
|-------|----------|-----------|-----------|----------------------------------------|--------------------------------------------|-------|
| ALB   | CA2      | ENSP00000 | ENSP00000 | Serum albumin; Serum albumin, the ma   | Carbonic anhydrase 2; Essential for bone   | 0.461 |
| ALB   | CASP3    | ENSP00000 | ENSP00000 | Serum albumin; Serum albumin, the ma   | Caspase-3; Involved in the activation cas  | 0.852 |
| ALB   | CD38     | ENSP00000 | ENSP00000 | Serum albumin; Serum albumin, the ma   | ADP-ribosyl cyclase/cyclic ADP-ribose h    | 0.567 |
| ALB   | DHFR     | ENSP00000 | ENSP00000 | Serum albumin; Serum albumin, the ma   | Dihydrofolate reductase; Key enzyme in f   | 0.483 |
| ALB   | FN1      | ENSP00000 | ENSP00000 | Serum albumin; Serum albumin, the ma   | Fibronectin 1; Fibronectin type III domai  | 0.954 |
| ALB   | HRAS     | ENSP00000 | ENSP00000 | Serum albumin; Serum albumin, the ma   | GTPase HRas; Involved in the activation    | 0.75  |
| ALB   | HSP90AA1 | ENSP00000 | ENSP00000 | Serum albumin; Serum albumin, the ma   | Heat shock protein HSP 90-alpha; Molec     | 0.57  |
| ALB   | IL2      | ENSP00000 | ENSP00000 | Serum albumin; Serum albumin, the ma   | Interleukin-2; Produced by T-cells in res  | 0.775 |
| ALB   | ITGAL    | ENSP00000 | ENSP00000 | Serum albumin; Serum albumin, the ma   | Integrin subunit alpha I; Integrin alpha-L | 0.433 |
| ALB   | KDR      | ENSP00000 | ENSP00000 | Serum albumin; Serum albumin, the ma   | Vascular endothelial growth factor recep   | 0.666 |
| ALB   | KLK3     | ENSP00000 | ENSP00000 | Serum albumin; Serum albumin, the ma   | Kallikrein related peptidase 3; Prostate-s | 0.653 |
| ALB   | LGALS3   | ENSP00000 | ENSP00000 | Serum albumin; Serum albumin, the ma   | Galectin-3; Galactose-specific lectin whi  | 0.654 |
| ALB   | LGALS4   | ENSP00000 | ENSP00000 | Serum albumin; Serum albumin, the ma   | Galectin-4; Galectin that binds lactose a  | 0.631 |
| ALB   | MAPK14   | ENSP00000 | ENSP00000 | Serum albumin; Serum albumin, the ma   | Mitogen-activated protein kinase 14; Ser   | 0.579 |
| ALB   | MET      | ENSP00000 | ENSP00000 | Serum albumin; Serum albumin, the ma   | Hepatocyte growth factor receptor; Rece    | 0.574 |
| ALB   | MMP12    | ENSP00000 | ENSP00000 | Serum albumin; Serum albumin, the ma   | Matrix metalloproteinase-12 (macropha      | 0.422 |
| ALB   | MMP13    | ENSP00000 | ENSP00000 | Serum albumin; Serum albumin, the ma   | Matrix metalloproteinase-13 (collagenas    | 0.581 |
| ALB   | MMP2     | ENSP00000 | ENSP00000 | Serum albumin; Serum albumin, the ma   | Matrix metalloproteinase-2 (gelatinase a   | 0.686 |
| ALB   | MMP8     | ENSP00000 | ENSP00000 | Serum albumin; Serum albumin, the ma   | Matrix metalloproteinase-8 (neutrophil c   | 0.671 |
| ALB   | MMP9     | ENSP00000 | ENSP00000 | Serum albumin; Serum albumin, the ma   | Matrix metalloproteinase-9; May play an    | 0.773 |
| ALB   | PPARG    | ENSP00000 | ENSP00000 | Serum albumin; Serum albumin, the ma   | Peroxisome proliferator-activated recept   | 0.737 |
| ALB   | PTGS2    | ENSP00000 | ENSP00000 | Serum albumin; Serum albumin, the ma   | Prostaglandin G/H synthase 2; Converts     | 0.703 |
| ALB   | RET      | ENSP00000 | ENSP00000 | Serum albumin; Serum albumin, the ma   | Proto-oncogene tyrosine-protein kinase     | 0.406 |
| ALB   | SRC      | ENSP00000 | ENSP00000 | Serum albumin; Serum albumin, the ma   | Proto-oncogene tyrosine-protein kinase     | 0.695 |
| ALB   | TLR9     | ENSP00000 | ENSP00000 | Serum albumin; Serum albumin, the ma   | Toll-like receptor 9; Key component of i   | 0.548 |
| ALB   | TNF      | ENSP00000 | ENSP00000 | Serum albumin; Serum albumin, the ma   | Tumor necrosis factor; Cytokine that bin   | 0.866 |
| ALB   | XDH      | ENSP00000 | ENSP00000 | Serum albumin; Serum albumin, the ma   | Xanthine dehydrogenase/oxidase; Key e      | 0.424 |
| ALOX5 | MMP2     | ENSP00000 | ENSP00000 | Arachidonate 5-lipoxygenase; Catalyzes | Matrix metalloproteinase-2 (gelatinase a   | 0.503 |
| ALOX5 | MMP9     | ENSP00000 | ENSP00000 | Arachidonate 5-lipoxygenase; Catalyzes | Matrix metalloproteinase-9; May play an    | 0.526 |
| ALOX5 | PPARG    | ENSP00000 | ENSP00000 | Arachidonate 5-lipoxygenase; Catalyzes | Peroxisome proliferator-activated recept   | 0.676 |
| ALOX5 | PTGS1    | ENSP00000 | ENSP00000 | Arachidonate 5-lipoxygenase; Catalyzes | Prostaglandin G/H synthase 1; Converts     | 0.973 |

|       |          |           |           |                                          |                                            |       |
|-------|----------|-----------|-----------|------------------------------------------|--------------------------------------------|-------|
| ALOX5 | PTGS2    | ENSP00000 | ENSP00000 | Arachidonate 5-lipoxygenase; Catalyzes   | Prostaglandin G/H synthase 2; Converts     | 0.982 |
| ALOX5 | TNF      | ENSP00000 | ENSP00000 | Arachidonate 5-lipoxygenase; Catalyzes   | Tumor necrosis factor; Cytokine that bin   | 0.652 |
| AURKA | CASP3    | ENSP00000 | ENSP00000 | Aurora kinase A; Mitotic serine/threonin | Caspase-3; Involved in the activation cas  | 0.434 |
| AURKA | HRAS     | ENSP00000 | ENSP00000 | Aurora kinase A; Mitotic serine/threonin | GTPase HRas; Involved in the activation    | 0.671 |
| AURKA | HSP90AA1 | ENSP00000 | ENSP00000 | Aurora kinase A; Mitotic serine/threonin | Heat shock protein HSP 90-alpha; Molec     | 0.446 |
| AURKA | PIK3CA   | ENSP00000 | ENSP00000 | Aurora kinase A; Mitotic serine/threonin | Phosphatidylinositol 4,5-bisphosphate 3    | 0.504 |
| AURKA | TYMS     | ENSP00000 | ENSP00000 | Aurora kinase A; Mitotic serine/threonin | Thymidylate synthetase; Thymidylate syn    | 0.909 |
| CA1   | ACHE     | ENSP00000 | ENSP00000 | Carbonic anhydrase 1; Reversible hydrat  | Acetylcholinesterase (cartwright blood g   | 0.563 |
| CA1   | ALB      | ENSP00000 | ENSP00000 | Carbonic anhydrase 1; Reversible hydrat  | Serum albumin; Serum albumin, the mai      | 0.467 |
| CA1   | CA2      | ENSP00000 | ENSP00000 | Carbonic anhydrase 1; Reversible hydrat  | Carbonic anhydrase 2; Essential for bone   | 0.62  |
| CA2   | ALB      | ENSP00000 | ENSP00000 | Carbonic anhydrase 2; Essential for bon  | Serum albumin; Serum albumin, the mai      | 0.461 |
| CA2   | CA1      | ENSP00000 | ENSP00000 | Carbonic anhydrase 2; Essential for bon  | Carbonic anhydrase 1; Reversible hydrati   | 0.62  |
| CA2   | MMP9     | ENSP00000 | ENSP00000 | Carbonic anhydrase 2; Essential for bon  | Matrix metalloproteinase-9; May play an    | 0.469 |
| CASP3 | ABCB1    | ENSP00000 | ENSP00000 | Caspase-3; Involved in the activation ca | Multidrug resistance protein 1; Energy-d   | 0.566 |
| CASP3 | ACHE     | ENSP00000 | ENSP00000 | Caspase-3; Involved in the activation ca | Acetylcholinesterase (cartwright blood g   | 0.53  |
| CASP3 | ALB      | ENSP00000 | ENSP00000 | Caspase-3; Involved in the activation ca | Serum albumin; Serum albumin, the mai      | 0.852 |
| CASP3 | AURKA    | ENSP00000 | ENSP00000 | Caspase-3; Involved in the activation ca | Aurora kinase A; Mitotic serine/threonin   | 0.434 |
| CASP3 | FN1      | ENSP00000 | ENSP00000 | Caspase-3; Involved in the activation ca | Fibronectin 1; Fibronectin type III domai  | 0.672 |
| CASP3 | HRAS     | ENSP00000 | ENSP00000 | Caspase-3; Involved in the activation ca | GTPase HRas; Involved in the activation    | 0.684 |
| CASP3 | HSP90AA1 | ENSP00000 | ENSP00000 | Caspase-3; Involved in the activation ca | Heat shock protein HSP 90-alpha; Molec     | 0.833 |
| CASP3 | IL2      | ENSP00000 | ENSP00000 | Caspase-3; Involved in the activation ca | Interleukin-2; Produced by T-cells in res  | 0.736 |
| CASP3 | KDR      | ENSP00000 | ENSP00000 | Caspase-3; Involved in the activation ca | Vascular endothelial growth factor recep   | 0.605 |
| CASP3 | KLK3     | ENSP00000 | ENSP00000 | Caspase-3; Involved in the activation ca | Kallikrein related peptidase 3; Prostate-s | 0.452 |
| CASP3 | LGALS3   | ENSP00000 | ENSP00000 | Caspase-3; Involved in the activation ca | Galectin-3; Galactose-specific lectin whi  | 0.46  |
| CASP3 | LGALS4   | ENSP00000 | ENSP00000 | Caspase-3; Involved in the activation ca | Galectin-4; Galectin that binds lactose a  | 0.408 |
| CASP3 | MAP3K14  | ENSP00000 | ENSP00000 | Caspase-3; Involved in the activation ca | Mitogen-activated protein kinase kinase    | 0.438 |
| CASP3 | MAPK14   | ENSP00000 | ENSP00000 | Caspase-3; Involved in the activation ca | Mitogen-activated protein kinase 14; Ser   | 0.977 |
| CASP3 | MET      | ENSP00000 | ENSP00000 | Caspase-3; Involved in the activation ca | Hepatocyte growth factor receptor; Rece    | 0.815 |
| CASP3 | MGMT     | ENSP00000 | ENSP00000 | Caspase-3; Involved in the activation ca | Methylated-dna-[protein]-cysteine s-m      | 0.437 |
| CASP3 | MMP13    | ENSP00000 | ENSP00000 | Caspase-3; Involved in the activation ca | Matrix metalloproteinase-13 (collagenas    | 0.522 |
| CASP3 | MMP2     | ENSP00000 | ENSP00000 | Caspase-3; Involved in the activation ca | Matrix metalloproteinase-2 (gelatinase a   | 0.681 |

|       |          |           |           |                                           |                                            |       |
|-------|----------|-----------|-----------|-------------------------------------------|--------------------------------------------|-------|
| CASP3 | MMP8     | ENSP00000 | ENSP00000 | Caspase-3; Involved in the activation ca  | Matrix metalloproteinase-8 (neutrophil c   | 0.494 |
| CASP3 | MMP9     | ENSP00000 | ENSP00000 | Caspase-3; Involved in the activation ca  | Matrix metalloproteinase-9; May play an    | 0.772 |
| CASP3 | PIK3CA   | ENSP00000 | ENSP00000 | Caspase-3; Involved in the activation ca  | Phosphatidylinositol 4,5-bisphosphate 3    | 0.53  |
| CASP3 | PPARG    | ENSP00000 | ENSP00000 | Caspase-3; Involved in the activation ca  | Peroxisome proliferator-activated recept   | 0.644 |
| CASP3 | PRKCB    | ENSP00000 | ENSP00000 | Caspase-3; Involved in the activation ca  | Protein kinase C beta type; Calcium-acti   | 0.855 |
| CASP3 | PRKCD    | ENSP00000 | ENSP00000 | Caspase-3; Involved in the activation ca  | Protein kinase C delta type; Calcium-ind   | 0.984 |
| CASP3 | PTGS2    | ENSP00000 | ENSP00000 | Caspase-3; Involved in the activation ca  | Prostaglandin G/H synthase 2; Converts     | 0.721 |
| CASP3 | RET      | ENSP00000 | ENSP00000 | Caspase-3; Involved in the activation ca  | Proto-oncogene tyrosine-protein kinase     | 0.619 |
| CASP3 | SRC      | ENSP00000 | ENSP00000 | Caspase-3; Involved in the activation ca  | Proto-oncogene tyrosine-protein kinase     | 0.689 |
| CASP3 | TLR9     | ENSP00000 | ENSP00000 | Caspase-3; Involved in the activation ca  | Toll-like receptor 9; Key component of i   | 0.414 |
| CASP3 | TNF      | ENSP00000 | ENSP00000 | Caspase-3; Involved in the activation ca  | Tumor necrosis factor; Cytokine that bin   | 0.896 |
| CASP3 | TYMS     | ENSP00000 | ENSP00000 | Caspase-3; Involved in the activation ca  | Thymidylate synthetase; Thymidylate syn    | 0.428 |
| CD38  | ALB      | ENSP00000 | ENSP00000 | ADP-ribosyl cyclase/cyclic ADP-ribose h   | Serum albumin; Serum albumin, the mai      | 0.567 |
| CD38  | IL2      | ENSP00000 | ENSP00000 | ADP-ribosyl cyclase/cyclic ADP-ribose h   | Interleukin-2; Produced by T-cells in res  | 0.667 |
| CD38  | ITGAL    | ENSP00000 | ENSP00000 | ADP-ribosyl cyclase/cyclic ADP-ribose h   | Integrin subunit alpha I; Integrin alpha-L | 0.609 |
| CD38  | MMP9     | ENSP00000 | ENSP00000 | ADP-ribosyl cyclase/cyclic ADP-ribose h   | Matrix metalloproteinase-9; May play an    | 0.449 |
| CD38  | PRKCB    | ENSP00000 | ENSP00000 | ADP-ribosyl cyclase/cyclic ADP-ribose h   | Protein kinase C beta type; Calcium-acti   | 0.837 |
| CD38  | TLR9     | ENSP00000 | ENSP00000 | ADP-ribosyl cyclase/cyclic ADP-ribose h   | Toll-like receptor 9; Key component of i   | 0.482 |
| CD38  | TNF      | ENSP00000 | ENSP00000 | ADP-ribosyl cyclase/cyclic ADP-ribose h   | Tumor necrosis factor; Cytokine that bin   | 0.64  |
| DHFR  | ABCB1    | ENSP00000 | ENSP00000 | Dihydrofolate reductase; Key enzyme in    | Multidrug resistance protein 1; Energy-d   | 0.485 |
| DHFR  | ALB      | ENSP00000 | ENSP00000 | Dihydrofolate reductase; Key enzyme in    | Serum albumin; Serum albumin, the mai      | 0.483 |
| DHFR  | HRAS     | ENSP00000 | ENSP00000 | Dihydrofolate reductase; Key enzyme in    | GTPase HRas; Involved in the activation    | 0.421 |
| DHFR  | HSP90AA1 | ENSP00000 | ENSP00000 | Dihydrofolate reductase; Key enzyme in    | Heat shock protein HSP 90-alpha; Molec     | 0.488 |
| DHFR  | TYMP     | ENSP00000 | ENSP00000 | Dihydrofolate reductase; Key enzyme in    | Thymidine phosphorylase; May have a r      | 0.495 |
| DHFR  | TYMS     | ENSP00000 | ENSP00000 | Dihydrofolate reductase; Key enzyme in    | Thymidylate synthetase; Thymidylate syn    | 0.999 |
| FN1   | ABCB1    | ENSP00000 | ENSP00000 | Fibronectin 1; Fibronectin type III domai | Multidrug resistance protein 1; Energy-d   | 0.489 |
| FN1   | ACHE     | ENSP00000 | ENSP00000 | Fibronectin 1; Fibronectin type III domai | Acetylcholinesterase (cartwright blood g   | 0.529 |
| FN1   | ALB      | ENSP00000 | ENSP00000 | Fibronectin 1; Fibronectin type III domai | Serum albumin; Serum albumin, the mai      | 0.954 |
| FN1   | CASP3    | ENSP00000 | ENSP00000 | Fibronectin 1; Fibronectin type III domai | Caspase-3; Involved in the activation cas  | 0.672 |
| FN1   | HRAS     | ENSP00000 | ENSP00000 | Fibronectin 1; Fibronectin type III domai | GTPase HRas; Involved in the activation    | 0.843 |
| FN1   | HSP90AA1 | ENSP00000 | ENSP00000 | Fibronectin 1; Fibronectin type III domai | Heat shock protein HSP 90-alpha; Molec     | 0.592 |

|       |        |           |           |                                           |                                            |       |
|-------|--------|-----------|-----------|-------------------------------------------|--------------------------------------------|-------|
| FN1   | IL2    | ENSP00000 | ENSP00000 | Fibronectin 1; Fibronectin type III domai | Interleukin-2; Produced by T-cells in res  | 0.558 |
| FN1   | ITGAL  | ENSP00000 | ENSP00000 | Fibronectin 1; Fibronectin type III domai | Integrin subunit alpha I; Integrin alpha-L | 0.799 |
| FN1   | KDR    | ENSP00000 | ENSP00000 | Fibronectin 1; Fibronectin type III domai | Vascular endothelial growth factor recep   | 0.816 |
| FN1   | KLK3   | ENSP00000 | ENSP00000 | Fibronectin 1; Fibronectin type III domai | Kallikrein related peptidase 3; Prostate-s | 0.759 |
| FN1   | LGALS1 | ENSP00000 | ENSP00000 | Fibronectin 1; Fibronectin type III domai | Galectin-1; Lectin that binds beta-galact  | 0.732 |
| FN1   | LGALS3 | ENSP00000 | ENSP00000 | Fibronectin 1; Fibronectin type III domai | Galectin-3; Galactose-specific lectin whi  | 0.99  |
| FN1   | MAPK14 | ENSP00000 | ENSP00000 | Fibronectin 1; Fibronectin type III domai | Mitogen-activated protein kinase 14; Ser   | 0.551 |
| FN1   | MET    | ENSP00000 | ENSP00000 | Fibronectin 1; Fibronectin type III domai | Hepatocyte growth factor receptor; Rece    | 0.768 |
| FN1   | MMP12  | ENSP00000 | ENSP00000 | Fibronectin 1; Fibronectin type III domai | Matrix metalloproteinase-12 (macropha      | 0.583 |
| FN1   | MMP13  | ENSP00000 | ENSP00000 | Fibronectin 1; Fibronectin type III domai | Matrix metalloproteinase-13 (collagenas    | 0.665 |
| FN1   | MMP2   | ENSP00000 | ENSP00000 | Fibronectin 1; Fibronectin type III domai | Matrix metalloproteinase-2 (gelatinase a   | 0.607 |
| FN1   | MMP8   | ENSP00000 | ENSP00000 | Fibronectin 1; Fibronectin type III domai | Matrix metalloproteinase-8 (neutrophil c   | 0.707 |
| FN1   | MMP9   | ENSP00000 | ENSP00000 | Fibronectin 1; Fibronectin type III domai | Matrix metalloproteinase-9; May play an    | 0.608 |
| FN1   | PPARG  | ENSP00000 | ENSP00000 | Fibronectin 1; Fibronectin type III domai | Peroxisome proliferator-activated recept   | 0.567 |
| FN1   | PTGS2  | ENSP00000 | ENSP00000 | Fibronectin 1; Fibronectin type III domai | Prostaglandin G/H synthase 2; Converts     | 0.654 |
| FN1   | SRC    | ENSP00000 | ENSP00000 | Fibronectin 1; Fibronectin type III domai | Proto-oncogene tyrosine-protein kinase     | 0.981 |
| FN1   | TLR9   | ENSP00000 | ENSP00000 | Fibronectin 1; Fibronectin type III domai | Toll-like receptor 9; Key component of i   | 0.404 |
| FN1   | TNF    | ENSP00000 | ENSP00000 | Fibronectin 1; Fibronectin type III domai | Tumor necrosis factor; Cytokine that bin   | 0.93  |
| GPR55 | HCAR2  | ENSP00000 | ENSP00000 | G protein-coupled receptor 55; G-prote    | Hydroxycarboxylic acid receptor 2; Acts a  | 0.622 |
| GPR55 | PPARG  | ENSP00000 | ENSP00000 | G protein-coupled receptor 55; G-prote    | Peroxisome proliferator-activated recept   | 0.522 |
| GPR55 | PTGS2  | ENSP00000 | ENSP00000 | G protein-coupled receptor 55; G-prote    | Prostaglandin G/H synthase 2; Converts     | 0.415 |
| GPR55 | PTPN22 | ENSP00000 | ENSP00000 | G protein-coupled receptor 55; G-prote    | Tyrosine-protein phosphatase non-rece      | 0.42  |
| HCAR2 | GPR55  | ENSP00000 | ENSP00000 | Hydroxycarboxylic acid receptor 2; Acts   | G protein-coupled receptor 55; G-protei    | 0.622 |
| HCAR2 | PPARG  | ENSP00000 | ENSP00000 | Hydroxycarboxylic acid receptor 2; Acts   | Peroxisome proliferator-activated recept   | 0.545 |
| HCAR2 | TNF    | ENSP00000 | ENSP00000 | Hydroxycarboxylic acid receptor 2; Acts   | Tumor necrosis factor; Cytokine that bin   | 0.486 |
| HRAS  | ABCB1  | ENSP00000 | ENSP00000 | GTPase HRas; Involved in the activation   | Multidrug resistance protein 1; Energy-d   | 0.417 |
| HRAS  | ALB    | ENSP00000 | ENSP00000 | GTPase HRas; Involved in the activation   | Serum albumin; Serum albumin, the mai      | 0.75  |
| HRAS  | AURKA  | ENSP00000 | ENSP00000 | GTPase HRas; Involved in the activation   | Aurora kinase A; Mitotic serine/threonin   | 0.671 |
| HRAS  | CASP3  | ENSP00000 | ENSP00000 | GTPase HRas; Involved in the activation   | Caspase-3; Involved in the activation cas  | 0.684 |
| HRAS  | DHFR   | ENSP00000 | ENSP00000 | GTPase HRas; Involved in the activation   | Dihydrofolate reductase; Key enzyme in f   | 0.421 |
| HRAS  | FN1    | ENSP00000 | ENSP00000 | GTPase HRas; Involved in the activation   | Fibronectin 1; Fibronectin type III domai  | 0.843 |

|          |          |           |           |                                         |                                            |       |
|----------|----------|-----------|-----------|-----------------------------------------|--------------------------------------------|-------|
| HRAS     | HSP90AA1 | ENSP00000 | ENSP00000 | GTPase HRas; Involved in the activation | Heat shock protein HSP 90-alpha; Molec     | 0.976 |
| HRAS     | IL2      | ENSP00000 | ENSP00000 | GTPase HRas; Involved in the activation | Interleukin-2; Produced by T-cells in res  | 0.95  |
| HRAS     | KDR      | ENSP00000 | ENSP00000 | GTPase HRas; Involved in the activation | Vascular endothelial growth factor recep   | 0.71  |
| HRAS     | KLK3     | ENSP00000 | ENSP00000 | GTPase HRas; Involved in the activation | Kallikrein related peptidase 3; Prostate-s | 0.411 |
| HRAS     | LGALS1   | ENSP00000 | ENSP00000 | GTPase HRas; Involved in the activation | Galectin-1; Lectin that binds beta-galact  | 0.99  |
| HRAS     | LGALS3   | ENSP00000 | ENSP00000 | GTPase HRas; Involved in the activation | Galectin-3; Galactose-specific lectin whi  | 0.996 |
| HRAS     | MAPK14   | ENSP00000 | ENSP00000 | GTPase HRas; Involved in the activation | Mitogen-activated protein kinase 14; Ser   | 0.708 |
| HRAS     | MET      | ENSP00000 | ENSP00000 | GTPase HRas; Involved in the activation | Hepatocyte growth factor receptor; Rece    | 0.982 |
| HRAS     | MGMT     | ENSP00000 | ENSP00000 | GTPase HRas; Involved in the activation | Methylated-dna-[protein]-cysteine s-m      | 0.652 |
| HRAS     | MMP2     | ENSP00000 | ENSP00000 | GTPase HRas; Involved in the activation | Matrix metalloproteinase-2 (gelatinase a   | 0.504 |
| HRAS     | MMP9     | ENSP00000 | ENSP00000 | GTPase HRas; Involved in the activation | Matrix metalloproteinase-9; May play an    | 0.6   |
| HRAS     | PIK3CA   | ENSP00000 | ENSP00000 | GTPase HRas; Involved in the activation | Phosphatidylinositol 4,5-bisphosphate 3    | 0.999 |
| HRAS     | PIK3CG   | ENSP00000 | ENSP00000 | GTPase HRas; Involved in the activation | Phosphatidylinositol 4,5-bisphosphate 3    | 0.998 |
| HRAS     | PPARG    | ENSP00000 | ENSP00000 | GTPase HRas; Involved in the activation | Peroxisome proliferator-activated recept   | 0.544 |
| HRAS     | PRKCB    | ENSP00000 | ENSP00000 | GTPase HRas; Involved in the activation | Protein kinase C beta type; Calcium-acti   | 0.931 |
| HRAS     | PRKCD    | ENSP00000 | ENSP00000 | GTPase HRas; Involved in the activation | Protein kinase C delta type; Calcium-ind   | 0.945 |
| HRAS     | PTGS2    | ENSP00000 | ENSP00000 | GTPase HRas; Involved in the activation | Prostaglandin G/H synthase 2; Converts     | 0.58  |
| HRAS     | RET      | ENSP00000 | ENSP00000 | GTPase HRas; Involved in the activation | Proto-oncogene tyrosine-protein kinase     | 0.984 |
| HRAS     | SRC      | ENSP00000 | ENSP00000 | GTPase HRas; Involved in the activation | Proto-oncogene tyrosine-protein kinase     | 0.996 |
| HRAS     | TLR9     | ENSP00000 | ENSP00000 | GTPase HRas; Involved in the activation | Toll-like receptor 9; Key component of i   | 0.414 |
| HRAS     | TNF      | ENSP00000 | ENSP00000 | GTPase HRas; Involved in the activation | Tumor necrosis factor; Cytokine that bin   | 0.623 |
| HRAS     | TYMS     | ENSP00000 | ENSP00000 | GTPase HRas; Involved in the activation | Thymidylate synthetase; Thymidylate syn    | 0.569 |
| HSP90AA1 | ABCB1    | ENSP00000 | ENSP00000 | Heat shock protein HSP 90-alpha; Mole   | Multidrug resistance protein 1; Energy-d   | 0.427 |
| HSP90AA1 | ALB      | ENSP00000 | ENSP00000 | Heat shock protein HSP 90-alpha; Mole   | Serum albumin; Serum albumin, the mai      | 0.57  |
| HSP90AA1 | AURKA    | ENSP00000 | ENSP00000 | Heat shock protein HSP 90-alpha; Mole   | Aurora kinase A; Mitotic serine/threonin   | 0.446 |
| HSP90AA1 | CASP3    | ENSP00000 | ENSP00000 | Heat shock protein HSP 90-alpha; Mole   | Caspase-3; Involved in the activation cas  | 0.833 |
| HSP90AA1 | DHFR     | ENSP00000 | ENSP00000 | Heat shock protein HSP 90-alpha; Mole   | Dihydrofolate reductase; Key enzyme in f   | 0.488 |
| HSP90AA1 | FN1      | ENSP00000 | ENSP00000 | Heat shock protein HSP 90-alpha; Mole   | Fibronectin 1; Fibronectin type III domai  | 0.592 |
| HSP90AA1 | HRAS     | ENSP00000 | ENSP00000 | Heat shock protein HSP 90-alpha; Mole   | GTPase HRas; Involved in the activation    | 0.976 |
| HSP90AA1 | IL2      | ENSP00000 | ENSP00000 | Heat shock protein HSP 90-alpha; Mole   | Interleukin-2; Produced by T-cells in res  | 0.948 |
| HSP90AA1 | KDR      | ENSP00000 | ENSP00000 | Heat shock protein HSP 90-alpha; Mole   | Vascular endothelial growth factor recep   | 0.992 |

|          |          |           |           |                                           |                                            |       |
|----------|----------|-----------|-----------|-------------------------------------------|--------------------------------------------|-------|
| HSP90AA1 | KLK3     | ENSP00000 | ENSP00000 | Heat shock protein HSP 90-alpha; Mole     | Kallikrein related peptidase 3; Prostate-s | 0.405 |
| HSP90AA1 | MAP3K14  | ENSP00000 | ENSP00000 | Heat shock protein HSP 90-alpha; Mole     | Mitogen-activated protein kinase kinase    | 0.733 |
| HSP90AA1 | MAPK14   | ENSP00000 | ENSP00000 | Heat shock protein HSP 90-alpha; Mole     | Mitogen-activated protein kinase 14; Ser   | 0.627 |
| HSP90AA1 | MET      | ENSP00000 | ENSP00000 | Heat shock protein HSP 90-alpha; Mole     | Hepatocyte growth factor receptor; Rece    | 0.771 |
| HSP90AA1 | MGMT     | ENSP00000 | ENSP00000 | Heat shock protein HSP 90-alpha; Mole     | Methylated-dna-[protein]-cysteine s-m      | 0.6   |
| HSP90AA1 | MMP12    | ENSP00000 | ENSP00000 | Heat shock protein HSP 90-alpha; Mole     | Matrix metalloproteinase-12 (macropha      | 0.453 |
| HSP90AA1 | MMP2     | ENSP00000 | ENSP00000 | Heat shock protein HSP 90-alpha; Mole     | Matrix metalloproteinase-2 (gelatinase a   | 0.938 |
| HSP90AA1 | MMP9     | ENSP00000 | ENSP00000 | Heat shock protein HSP 90-alpha; Mole     | Matrix metalloproteinase-9; May play an    | 0.452 |
| HSP90AA1 | PIK3CA   | ENSP00000 | ENSP00000 | Heat shock protein HSP 90-alpha; Mole     | Phosphatidylinositol 4,5-bisphosphate 3    | 0.88  |
| HSP90AA1 | PPARG    | ENSP00000 | ENSP00000 | Heat shock protein HSP 90-alpha; Mole     | Peroxisome proliferator-activated recept   | 0.782 |
| HSP90AA1 | PRKCD    | ENSP00000 | ENSP00000 | Heat shock protein HSP 90-alpha; Mole     | Protein kinase C delta type; Calcium-ind   | 0.858 |
| HSP90AA1 | PTGS2    | ENSP00000 | ENSP00000 | Heat shock protein HSP 90-alpha; Mole     | Prostaglandin G/H synthase 2; Converts     | 0.429 |
| HSP90AA1 | RET      | ENSP00000 | ENSP00000 | Heat shock protein HSP 90-alpha; Mole     | Proto-oncogene tyrosine-protein kinase     | 0.723 |
| HSP90AA1 | SRC      | ENSP00000 | ENSP00000 | Heat shock protein HSP 90-alpha; Mole     | Proto-oncogene tyrosine-protein kinase     | 0.999 |
| HSP90AA1 | TNF      | ENSP00000 | ENSP00000 | Heat shock protein HSP 90-alpha; Mole     | Tumor necrosis factor; Cytokine that bin   | 0.572 |
| IL2      | ALB      | ENSP00000 | ENSP00000 | Interleukin-2; Produced by T-cells in res | Serum albumin; Serum albumin, the mai      | 0.775 |
| IL2      | CASP3    | ENSP00000 | ENSP00000 | Interleukin-2; Produced by T-cells in res | Caspase-3; Involved in the activation cas  | 0.736 |
| IL2      | CD38     | ENSP00000 | ENSP00000 | Interleukin-2; Produced by T-cells in res | ADP-ribosyl cyclase/cyclic ADP-ribose h    | 0.667 |
| IL2      | FN1      | ENSP00000 | ENSP00000 | Interleukin-2; Produced by T-cells in res | Fibronectin 1; Fibronectin type III domai  | 0.558 |
| IL2      | HRAS     | ENSP00000 | ENSP00000 | Interleukin-2; Produced by T-cells in res | GTPase HRas; Involved in the activation    | 0.95  |
| IL2      | HSP90AA1 | ENSP00000 | ENSP00000 | Interleukin-2; Produced by T-cells in res | Heat shock protein HSP 90-alpha; Molec     | 0.948 |
| IL2      | ITGAL    | ENSP00000 | ENSP00000 | Interleukin-2; Produced by T-cells in res | Integrin subunit alpha I; Integrin alpha-L | 0.631 |
| IL2      | KDR      | ENSP00000 | ENSP00000 | Interleukin-2; Produced by T-cells in res | Vascular endothelial growth factor recep   | 0.414 |
| IL2      | KLK3     | ENSP00000 | ENSP00000 | Interleukin-2; Produced by T-cells in res | Kallikrein related peptidase 3; Prostate-s | 0.45  |
| IL2      | LGALS9   | ENSP00000 | ENSP00000 | Interleukin-2; Produced by T-cells in res | Galectin-9; Binds galactosides. Has high   | 0.5   |
| IL2      | MAPK14   | ENSP00000 | ENSP00000 | Interleukin-2; Produced by T-cells in res | Mitogen-activated protein kinase 14; Ser   | 0.938 |
| IL2      | MMP2     | ENSP00000 | ENSP00000 | Interleukin-2; Produced by T-cells in res | Matrix metalloproteinase-2 (gelatinase a   | 0.424 |
| IL2      | MMP9     | ENSP00000 | ENSP00000 | Interleukin-2; Produced by T-cells in res | Matrix metalloproteinase-9; May play an    | 0.56  |
| IL2      | PIK3CA   | ENSP00000 | ENSP00000 | Interleukin-2; Produced by T-cells in res | Phosphatidylinositol 4,5-bisphosphate 3    | 0.919 |
| IL2      | PPARG    | ENSP00000 | ENSP00000 | Interleukin-2; Produced by T-cells in res | Peroxisome proliferator-activated recept   | 0.459 |
| IL2      | PRKCB    | ENSP00000 | ENSP00000 | Interleukin-2; Produced by T-cells in res | Protein kinase C beta type; Calcium-acti   | 0.916 |

|       |          |           |           |                                           |                                           |       |
|-------|----------|-----------|-----------|-------------------------------------------|-------------------------------------------|-------|
| IL2   | PTGS2    | ENSP00000 | ENSP00000 | Interleukin-2; Produced by T-cells in res | Prostaglandin G/H synthase 2; Converts    | 0.577 |
| IL2   | PTPN2    | ENSP00000 | ENSP00000 | Interleukin-2; Produced by T-cells in res | Tyrosine-protein phosphatase non-rece     | 0.569 |
| IL2   | PTPN22   | ENSP00000 | ENSP00000 | Interleukin-2; Produced by T-cells in res | Tyrosine-protein phosphatase non-rece     | 0.529 |
| IL2   | SRC      | ENSP00000 | ENSP00000 | Interleukin-2; Produced by T-cells in res | Proto-oncogene tyrosine-protein kinase    | 0.561 |
| IL2   | TLR9     | ENSP00000 | ENSP00000 | Interleukin-2; Produced by T-cells in res | Toll-like receptor 9; Key component of i  | 0.684 |
| IL2   | TNF      | ENSP00000 | ENSP00000 | Interleukin-2; Produced by T-cells in res | Tumor necrosis factor; Cytokine that bin  | 0.933 |
| ITGAL | ALB      | ENSP00000 | ENSP00000 | Integrin subunit alpha I; Integrin alpha- | Serum albumin; Serum albumin, the mai     | 0.433 |
| ITGAL | CD38     | ENSP00000 | ENSP00000 | Integrin subunit alpha I; Integrin alpha- | ADP-ribosyl cyclase/cyclic ADP-ribose h   | 0.609 |
| ITGAL | FN1      | ENSP00000 | ENSP00000 | Integrin subunit alpha I; Integrin alpha- | Fibronectin 1; Fibronectin type III domai | 0.799 |
| ITGAL | IL2      | ENSP00000 | ENSP00000 | Integrin subunit alpha I; Integrin alpha- | Interleukin-2; Produced by T-cells in res | 0.631 |
| ITGAL | SRC      | ENSP00000 | ENSP00000 | Integrin subunit alpha I; Integrin alpha- | Proto-oncogene tyrosine-protein kinase    | 0.708 |
| ITGAL | TNF      | ENSP00000 | ENSP00000 | Integrin subunit alpha I; Integrin alpha- | Tumor necrosis factor; Cytokine that bin  | 0.692 |
| KDR   | ABCB1    | ENSP00000 | ENSP00000 | Vascular endothelial growth factor rece   | Multidrug resistance protein 1; Energy-d  | 0.404 |
| KDR   | ADORA3   | ENSP00000 | ENSP00000 | Vascular endothelial growth factor rece   | Transmembrane domain-containing pro       | 0.439 |
| KDR   | ALB      | ENSP00000 | ENSP00000 | Vascular endothelial growth factor rece   | Serum albumin; Serum albumin, the mai     | 0.666 |
| KDR   | CASP3    | ENSP00000 | ENSP00000 | Vascular endothelial growth factor rece   | Caspase-3; Involved in the activation cas | 0.605 |
| KDR   | FN1      | ENSP00000 | ENSP00000 | Vascular endothelial growth factor rece   | Fibronectin 1; Fibronectin type III domai | 0.816 |
| KDR   | HRAS     | ENSP00000 | ENSP00000 | Vascular endothelial growth factor rece   | GTPase HRas; Involved in the activation   | 0.71  |
| KDR   | HSP90AA1 | ENSP00000 | ENSP00000 | Vascular endothelial growth factor rece   | Heat shock protein HSP 90-alpha; Molec    | 0.992 |
| KDR   | IL2      | ENSP00000 | ENSP00000 | Vascular endothelial growth factor rece   | Interleukin-2; Produced by T-cells in res | 0.414 |
| KDR   | LGALS3   | ENSP00000 | ENSP00000 | Vascular endothelial growth factor rece   | Galectin-3; Galactose-specific lectin whi | 0.943 |
| KDR   | MAPK14   | ENSP00000 | ENSP00000 | Vascular endothelial growth factor rece   | Mitogen-activated protein kinase 14; Ser  | 0.924 |
| KDR   | MET      | ENSP00000 | ENSP00000 | Vascular endothelial growth factor rece   | Hepatocyte growth factor receptor; Rece   | 0.702 |
| KDR   | MMP2     | ENSP00000 | ENSP00000 | Vascular endothelial growth factor rece   | Matrix metalloproteinase-2 (gelatinase a  | 0.639 |
| KDR   | MMP9     | ENSP00000 | ENSP00000 | Vascular endothelial growth factor rece   | Matrix metalloproteinase-9; May play an   | 0.76  |
| KDR   | PIK3CA   | ENSP00000 | ENSP00000 | Vascular endothelial growth factor rece   | Phosphatidylinositol 4,5-bisphosphate 3   | 0.976 |
| KDR   | PIK3CG   | ENSP00000 | ENSP00000 | Vascular endothelial growth factor rece   | Phosphatidylinositol 4,5-bisphosphate 3   | 0.52  |
| KDR   | PPARG    | ENSP00000 | ENSP00000 | Vascular endothelial growth factor rece   | Peroxisome proliferator-activated recept  | 0.476 |
| KDR   | PTGS2    | ENSP00000 | ENSP00000 | Vascular endothelial growth factor rece   | Prostaglandin G/H synthase 2; Converts    | 0.477 |
| KDR   | PTPN2    | ENSP00000 | ENSP00000 | Vascular endothelial growth factor rece   | Tyrosine-protein phosphatase non-rece     | 0.917 |
| KDR   | RET      | ENSP00000 | ENSP00000 | Vascular endothelial growth factor rece   | Proto-oncogene tyrosine-protein kinase    | 0.466 |



|        |          |           |           |                                           |                                           |       |
|--------|----------|-----------|-----------|-------------------------------------------|-------------------------------------------|-------|
| KDR    | SRC      | ENSP00000 | ENSP00000 | Vascular endothelial growth factor rece   | Proto-oncogene tyrosine-protein kinase    | 0.992 |
| KDR    | TNF      | ENSP00000 | ENSP00000 | Vascular endothelial growth factor rece   | Tumor necrosis factor; Cytokine that bin  | 0.623 |
| KLK3   | ALB      | ENSP00000 | ENSP00000 | Kallikrein related peptidase 3; Prostate- | Serum albumin; Serum albumin, the mai     | 0.653 |
| KLK3   | CASP3    | ENSP00000 | ENSP00000 | Kallikrein related peptidase 3; Prostate- | Caspase-3; Involved in the activation cas | 0.452 |
| KLK3   | FN1      | ENSP00000 | ENSP00000 | Kallikrein related peptidase 3; Prostate- | Fibronectin 1; Fibronectin type III domai | 0.759 |
| KLK3   | HRAS     | ENSP00000 | ENSP00000 | Kallikrein related peptidase 3; Prostate- | GTPase HRas; Involved in the activation   | 0.411 |
| KLK3   | HSP90AA1 | ENSP00000 | ENSP00000 | Kallikrein related peptidase 3; Prostate- | Heat shock protein HSP 90-alpha; Molec    | 0.405 |
| KLK3   | IL2      | ENSP00000 | ENSP00000 | Kallikrein related peptidase 3; Prostate- | Interleukin-2; Produced by T-cells in res | 0.45  |
| KLK3   | MMP2     | ENSP00000 | ENSP00000 | Kallikrein related peptidase 3; Prostate- | Matrix metalloproteinase-2 (gelatinase a  | 0.422 |
| KLK3   | MMP9     | ENSP00000 | ENSP00000 | Kallikrein related peptidase 3; Prostate- | Matrix metalloproteinase-9; May play an   | 0.459 |
| KLK3   | PTGS2    | ENSP00000 | ENSP00000 | Kallikrein related peptidase 3; Prostate- | Prostaglandin G/H synthase 2; Converts    | 0.411 |
| KLK3   | SRC      | ENSP00000 | ENSP00000 | Kallikrein related peptidase 3; Prostate- | Proto-oncogene tyrosine-protein kinase    | 0.413 |
| KLK3   | TNF      | ENSP00000 | ENSP00000 | Kallikrein related peptidase 3; Prostate- | Tumor necrosis factor; Cytokine that bin  | 0.403 |
| LGALS1 | FN1      | ENSP00000 | ENSP00000 | Galectin-1; Lectin that binds beta-galac  | Fibronectin 1; Fibronectin type III domai | 0.732 |
| LGALS1 | HRAS     | ENSP00000 | ENSP00000 | Galectin-1; Lectin that binds beta-galac  | GTPase HRas; Involved in the activation   | 0.99  |
| LGALS1 | LGALS3   | ENSP00000 | ENSP00000 | Galectin-1; Lectin that binds beta-galac  | Galectin-3; Galactose-specific lectin whi | 0.502 |
| LGALS3 | ALB      | ENSP00000 | ENSP00000 | Galectin-3; Galactose-specific lectin whi | Serum albumin; Serum albumin, the mai     | 0.654 |
| LGALS3 | CASP3    | ENSP00000 | ENSP00000 | Galectin-3; Galactose-specific lectin whi | Caspase-3; Involved in the activation cas | 0.46  |
| LGALS3 | FN1      | ENSP00000 | ENSP00000 | Galectin-3; Galactose-specific lectin whi | Fibronectin 1; Fibronectin type III domai | 0.99  |
| LGALS3 | HRAS     | ENSP00000 | ENSP00000 | Galectin-3; Galactose-specific lectin whi | GTPase HRas; Involved in the activation   | 0.996 |
| LGALS3 | KDR      | ENSP00000 | ENSP00000 | Galectin-3; Galactose-specific lectin whi | Vascular endothelial growth factor recep  | 0.943 |
| LGALS3 | LGALS1   | ENSP00000 | ENSP00000 | Galectin-3; Galactose-specific lectin whi | Galectin-1; Lectin that binds beta-galact | 0.502 |
| LGALS3 | LGALS9   | ENSP00000 | ENSP00000 | Galectin-3; Galactose-specific lectin whi | Galectin-9; Binds galactosides. Has high  | 0.738 |
| LGALS3 | MMP2     | ENSP00000 | ENSP00000 | Galectin-3; Galactose-specific lectin whi | Matrix metalloproteinase-2 (gelatinase a  | 0.574 |
| LGALS3 | MMP9     | ENSP00000 | ENSP00000 | Galectin-3; Galactose-specific lectin whi | Matrix metalloproteinase-9; May play an   | 0.729 |
| LGALS3 | PPARG    | ENSP00000 | ENSP00000 | Galectin-3; Galactose-specific lectin whi | Peroxisome proliferator-activated recept  | 0.472 |
| LGALS3 | RET      | ENSP00000 | ENSP00000 | Galectin-3; Galactose-specific lectin whi | Proto-oncogene tyrosine-protein kinase    | 0.414 |
| LGALS3 | SRC      | ENSP00000 | ENSP00000 | Galectin-3; Galactose-specific lectin whi | Proto-oncogene tyrosine-protein kinase    | 0.555 |
| LGALS3 | TNF      | ENSP00000 | ENSP00000 | Galectin-3; Galactose-specific lectin whi | Tumor necrosis factor; Cytokine that bin  | 0.624 |
| LGALS4 | ALB      | ENSP00000 | ENSP00000 | Galectin-4; Galectin that binds lactose a | Serum albumin; Serum albumin, the mai     | 0.631 |
| LGALS4 | CASP3    | ENSP00000 | ENSP00000 | Galectin-4; Galectin that binds lactose a | Caspase-3; Involved in the activation cas | 0.408 |

|         |          |           |           |                                           |                                           |       |
|---------|----------|-----------|-----------|-------------------------------------------|-------------------------------------------|-------|
| LGALS4  | PPARG    | ENSP00000 | ENSP00000 | Galectin-4; Galectin that binds lactose a | Peroxisome proliferator-activated recept  | 0.973 |
| LGALS4  | SRC      | ENSP00000 | ENSP00000 | Galectin-4; Galectin that binds lactose a | Proto-oncogene tyrosine-protein kinase    | 0.426 |
| LGALS9  | IL2      | ENSP00000 | ENSP00000 | Galectin-9; Binds galactosides. Has high  | Interleukin-2; Produced by T-cells in res | 0.5   |
| LGALS9  | LGALS3   | ENSP00000 | ENSP00000 | Galectin-9; Binds galactosides. Has high  | Galectin-3; Galactose-specific lectin whi | 0.738 |
| LGALS9  | TNF      | ENSP00000 | ENSP00000 | Galectin-9; Binds galactosides. Has high  | Tumor necrosis factor; Cytokine that bin  | 0.555 |
| MAP3K14 | ADORA3   | ENSP00000 | ENSP00000 | Mitogen-activated protein kinase kinas    | Transmembrane domain-containing pro       | 0.569 |
| MAP3K14 | CASP3    | ENSP00000 | ENSP00000 | Mitogen-activated protein kinase kinas    | Caspase-3; Involved in the activation cas | 0.438 |
| MAP3K14 | HSP90AA1 | ENSP00000 | ENSP00000 | Mitogen-activated protein kinase kinas    | Heat shock protein HSP 90-alpha; Molec    | 0.733 |
| MAP3K14 | TNF      | ENSP00000 | ENSP00000 | Mitogen-activated protein kinase kinas    | Tumor necrosis factor; Cytokine that bin  | 0.924 |
| MAPK14  | ALB      | ENSP00000 | ENSP00000 | Mitogen-activated protein kinase 14; Se   | Serum albumin; Serum albumin, the mai     | 0.579 |
| MAPK14  | CASP3    | ENSP00000 | ENSP00000 | Mitogen-activated protein kinase 14; Se   | Caspase-3; Involved in the activation cas | 0.977 |
| MAPK14  | FN1      | ENSP00000 | ENSP00000 | Mitogen-activated protein kinase 14; Se   | Fibronectin 1; Fibronectin type III domai | 0.551 |
| MAPK14  | HRAS     | ENSP00000 | ENSP00000 | Mitogen-activated protein kinase 14; Se   | GTPase HRas; Involved in the activation   | 0.708 |
| MAPK14  | HSP90AA1 | ENSP00000 | ENSP00000 | Mitogen-activated protein kinase 14; Se   | Heat shock protein HSP 90-alpha; Molec    | 0.627 |
| MAPK14  | IL2      | ENSP00000 | ENSP00000 | Mitogen-activated protein kinase 14; Se   | Interleukin-2; Produced by T-cells in res | 0.938 |
| MAPK14  | KDR      | ENSP00000 | ENSP00000 | Mitogen-activated protein kinase 14; Se   | Vascular endothelial growth factor recep  | 0.924 |
| MAPK14  | MMP13    | ENSP00000 | ENSP00000 | Mitogen-activated protein kinase 14; Se   | Matrix metalloproteinase-13 (collagenas   | 0.432 |
| MAPK14  | MMP9     | ENSP00000 | ENSP00000 | Mitogen-activated protein kinase 14; Se   | Matrix metalloproteinase-9; May play an   | 0.571 |
| MAPK14  | PIK3CA   | ENSP00000 | ENSP00000 | Mitogen-activated protein kinase 14; Se   | Phosphatidylinositol 4,5-bisphosphate 3   | 0.403 |
| MAPK14  | PIK3CG   | ENSP00000 | ENSP00000 | Mitogen-activated protein kinase 14; Se   | Phosphatidylinositol 4,5-bisphosphate 3   | 0.409 |
| MAPK14  | PPARG    | ENSP00000 | ENSP00000 | Mitogen-activated protein kinase 14; Se   | Peroxisome proliferator-activated recept  | 0.678 |
| MAPK14  | PTGS2    | ENSP00000 | ENSP00000 | Mitogen-activated protein kinase 14; Se   | Prostaglandin G/H synthase 2; Converts    | 0.633 |
| MAPK14  | SRC      | ENSP00000 | ENSP00000 | Mitogen-activated protein kinase 14; Se   | Proto-oncogene tyrosine-protein kinase    | 0.939 |
| MAPK14  | TLR9     | ENSP00000 | ENSP00000 | Mitogen-activated protein kinase 14; Se   | Toll-like receptor 9; Key component of i  | 0.468 |
| MAPK14  | TNF      | ENSP00000 | ENSP00000 | Mitogen-activated protein kinase 14; Se   | Tumor necrosis factor; Cytokine that bin  | 0.975 |
| MET     | ALB      | ENSP00000 | ENSP00000 | Hepatocyte growth factor receptor; Rec    | Serum albumin; Serum albumin, the mai     | 0.574 |
| MET     | CASP3    | ENSP00000 | ENSP00000 | Hepatocyte growth factor receptor; Rec    | Caspase-3; Involved in the activation cas | 0.815 |
| MET     | FN1      | ENSP00000 | ENSP00000 | Hepatocyte growth factor receptor; Rec    | Fibronectin 1; Fibronectin type III domai | 0.768 |
| MET     | HRAS     | ENSP00000 | ENSP00000 | Hepatocyte growth factor receptor; Rec    | GTPase HRas; Involved in the activation   | 0.982 |
| MET     | HSP90AA1 | ENSP00000 | ENSP00000 | Hepatocyte growth factor receptor; Rec    | Heat shock protein HSP 90-alpha; Molec    | 0.771 |
| MET     | KDR      | ENSP00000 | ENSP00000 | Hepatocyte growth factor receptor; Rec    | Vascular endothelial growth factor recep  | 0.702 |

|       |          |           |           |                                        |                                           |       |
|-------|----------|-----------|-----------|----------------------------------------|-------------------------------------------|-------|
| MET   | MGMT     | ENSP00000 | ENSP00000 | Hepatocyte growth factor receptor; Rec | Methylated-dna-[protein]-cysteine s-m     | 0.423 |
| MET   | MMP2     | ENSP00000 | ENSP00000 | Hepatocyte growth factor receptor; Rec | Matrix metalloproteinase-2 (gelatinase a  | 0.531 |
| MET   | MMP9     | ENSP00000 | ENSP00000 | Hepatocyte growth factor receptor; Rec | Matrix metalloproteinase-9; May play an   | 0.57  |
| MET   | PIK3CA   | ENSP00000 | ENSP00000 | Hepatocyte growth factor receptor; Rec | Phosphatidylinositol 4,5-bisphosphate 3   | 0.976 |
| MET   | PTGS2    | ENSP00000 | ENSP00000 | Hepatocyte growth factor receptor; Rec | Prostaglandin G/H synthase 2; Converts    | 0.477 |
| MET   | PTPN2    | ENSP00000 | ENSP00000 | Hepatocyte growth factor receptor; Rec | Tyrosine-protein phosphatase non-rece     | 0.92  |
| MET   | RET      | ENSP00000 | ENSP00000 | Hepatocyte growth factor receptor; Rec | Proto-oncogene tyrosine-protein kinase    | 0.474 |
| MET   | SRC      | ENSP00000 | ENSP00000 | Hepatocyte growth factor receptor; Rec | Proto-oncogene tyrosine-protein kinase    | 0.982 |
| MET   | TNF      | ENSP00000 | ENSP00000 | Hepatocyte growth factor receptor; Rec | Tumor necrosis factor; Cytokine that bin  | 0.487 |
| MGMT  | ABCB1    | ENSP00000 | ENSP00000 | Methylated-dna-[protein]-cysteine s-m  | Multidrug resistance protein 1; Energy-d  | 0.457 |
| MGMT  | CASP3    | ENSP00000 | ENSP00000 | Methylated-dna-[protein]-cysteine s-m  | Caspase-3; Involved in the activation cas | 0.437 |
| MGMT  | HRAS     | ENSP00000 | ENSP00000 | Methylated-dna-[protein]-cysteine s-m  | GTPase HRas; Involved in the activation   | 0.652 |
| MGMT  | HSP90AA1 | ENSP00000 | ENSP00000 | Methylated-dna-[protein]-cysteine s-m  | Heat shock protein HSP 90-alpha; Molec    | 0.6   |
| MGMT  | MET      | ENSP00000 | ENSP00000 | Methylated-dna-[protein]-cysteine s-m  | Hepatocyte growth factor receptor; Rece   | 0.423 |
| MGMT  | PIK3CA   | ENSP00000 | ENSP00000 | Methylated-dna-[protein]-cysteine s-m  | Phosphatidylinositol 4,5-bisphosphate 3   | 0.472 |
| MGMT  | TYMS     | ENSP00000 | ENSP00000 | Methylated-dna-[protein]-cysteine s-m  | Thymidylate synthetase; Thymidylate syn   | 0.419 |
| MMP12 | ALB      | ENSP00000 | ENSP00000 | Matrix metalloproteinase-12 (macropha  | Serum albumin; Serum albumin, the mai     | 0.422 |
| MMP12 | FN1      | ENSP00000 | ENSP00000 | Matrix metalloproteinase-12 (macropha  | Fibronectin 1; Fibronectin type III domai | 0.583 |
| MMP12 | HSP90AA1 | ENSP00000 | ENSP00000 | Matrix metalloproteinase-12 (macropha  | Heat shock protein HSP 90-alpha; Molec    | 0.453 |
| MMP12 | MMP9     | ENSP00000 | ENSP00000 | Matrix metalloproteinase-12 (macropha  | Matrix metalloproteinase-9; May play an   | 0.724 |
| MMP12 | PTGS2    | ENSP00000 | ENSP00000 | Matrix metalloproteinase-12 (macropha  | Prostaglandin G/H synthase 2; Converts    | 0.405 |
| MMP12 | TNF      | ENSP00000 | ENSP00000 | Matrix metalloproteinase-12 (macropha  | Tumor necrosis factor; Cytokine that bin  | 0.586 |
| MMP13 | ALB      | ENSP00000 | ENSP00000 | Matrix metalloproteinase-13 (collagena | Serum albumin; Serum albumin, the mai     | 0.581 |
| MMP13 | CASP3    | ENSP00000 | ENSP00000 | Matrix metalloproteinase-13 (collagena | Caspase-3; Involved in the activation cas | 0.522 |
| MMP13 | FN1      | ENSP00000 | ENSP00000 | Matrix metalloproteinase-13 (collagena | Fibronectin 1; Fibronectin type III domai | 0.665 |
| MMP13 | MAPK14   | ENSP00000 | ENSP00000 | Matrix metalloproteinase-13 (collagena | Mitogen-activated protein kinase 14; Ser  | 0.432 |
| MMP13 | MMP9     | ENSP00000 | ENSP00000 | Matrix metalloproteinase-13 (collagena | Matrix metalloproteinase-9; May play an   | 0.436 |
| MMP13 | PPARG    | ENSP00000 | ENSP00000 | Matrix metalloproteinase-13 (collagena | Peroxisome proliferator-activated recept  | 0.4   |
| MMP13 | PTGS2    | ENSP00000 | ENSP00000 | Matrix metalloproteinase-13 (collagena | Prostaglandin G/H synthase 2; Converts    | 0.636 |
| MMP13 | TNF      | ENSP00000 | ENSP00000 | Matrix metalloproteinase-13 (collagena | Tumor necrosis factor; Cytokine that bin  | 0.721 |
| MMP2  | ALB      | ENSP00000 | ENSP00000 | Matrix metalloproteinase-2 (gelatinase | Serum albumin; Serum albumin, the mai     | 0.686 |

|      |          |           |           |                                        |                                            |       |
|------|----------|-----------|-----------|----------------------------------------|--------------------------------------------|-------|
| MMP2 | ALOX5    | ENSP00000 | ENSP00000 | Matrix metalloproteinase-2 (gelatinase | Arachidonate 5-lipoxygenase; Catalyzes     | 0.503 |
| MMP2 | CASP3    | ENSP00000 | ENSP00000 | Matrix metalloproteinase-2 (gelatinase | Caspase-3; Involved in the activation cas  | 0.681 |
| MMP2 | FN1      | ENSP00000 | ENSP00000 | Matrix metalloproteinase-2 (gelatinase | Fibronectin 1; Fibronectin type III domai  | 0.607 |
| MMP2 | HRAS     | ENSP00000 | ENSP00000 | Matrix metalloproteinase-2 (gelatinase | GTPase HRas; Involved in the activation    | 0.504 |
| MMP2 | HSP90AA1 | ENSP00000 | ENSP00000 | Matrix metalloproteinase-2 (gelatinase | Heat shock protein HSP 90-alpha; Molec     | 0.938 |
| MMP2 | IL2      | ENSP00000 | ENSP00000 | Matrix metalloproteinase-2 (gelatinase | Interleukin-2; Produced by T-cells in res  | 0.424 |
| MMP2 | KDR      | ENSP00000 | ENSP00000 | Matrix metalloproteinase-2 (gelatinase | Vascular endothelial growth factor recep   | 0.639 |
| MMP2 | KLK3     | ENSP00000 | ENSP00000 | Matrix metalloproteinase-2 (gelatinase | Kallikrein related peptidase 3; Prostate-s | 0.422 |
| MMP2 | LGALS3   | ENSP00000 | ENSP00000 | Matrix metalloproteinase-2 (gelatinase | Galectin-3; Galactose-specific lectin whi  | 0.574 |
| MMP2 | MET      | ENSP00000 | ENSP00000 | Matrix metalloproteinase-2 (gelatinase | Hepatocyte growth factor receptor; Rece    | 0.531 |
| MMP2 | MMP9     | ENSP00000 | ENSP00000 | Matrix metalloproteinase-2 (gelatinase | Matrix metalloproteinase-9; May play an    | 0.908 |
| MMP2 | PPARG    | ENSP00000 | ENSP00000 | Matrix metalloproteinase-2 (gelatinase | Peroxisome proliferator-activated recept   | 0.514 |
| MMP2 | PTGS2    | ENSP00000 | ENSP00000 | Matrix metalloproteinase-2 (gelatinase | Prostaglandin G/H synthase 2; Converts     | 0.663 |
| MMP2 | SRC      | ENSP00000 | ENSP00000 | Matrix metalloproteinase-2 (gelatinase | Proto-oncogene tyrosine-protein kinase     | 0.96  |
| MMP2 | TNF      | ENSP00000 | ENSP00000 | Matrix metalloproteinase-2 (gelatinase | Tumor necrosis factor; Cytokine that bin   | 0.734 |
| MMP8 | ALB      | ENSP00000 | ENSP00000 | Matrix metalloproteinase-8 (neutrophil | Serum albumin; Serum albumin, the mai      | 0.671 |
| MMP8 | CASP3    | ENSP00000 | ENSP00000 | Matrix metalloproteinase-8 (neutrophil | Caspase-3; Involved in the activation cas  | 0.494 |
| MMP8 | FN1      | ENSP00000 | ENSP00000 | Matrix metalloproteinase-8 (neutrophil | Fibronectin 1; Fibronectin type III domai  | 0.707 |
| MMP8 | MMP9     | ENSP00000 | ENSP00000 | Matrix metalloproteinase-8 (neutrophil | Matrix metalloproteinase-9; May play an    | 0.651 |
| MMP8 | PTGS2    | ENSP00000 | ENSP00000 | Matrix metalloproteinase-8 (neutrophil | Prostaglandin G/H synthase 2; Converts     | 0.525 |
| MMP8 | TNF      | ENSP00000 | ENSP00000 | Matrix metalloproteinase-8 (neutrophil | Tumor necrosis factor; Cytokine that bin   | 0.675 |
| MMP9 | ALB      | ENSP00000 | ENSP00000 | Matrix metalloproteinase-9; May play a | Serum albumin; Serum albumin, the mai      | 0.773 |
| MMP9 | ALOX5    | ENSP00000 | ENSP00000 | Matrix metalloproteinase-9; May play a | Arachidonate 5-lipoxygenase; Catalyzes     | 0.526 |
| MMP9 | CA2      | ENSP00000 | ENSP00000 | Matrix metalloproteinase-9; May play a | Carbonic anhydrase 2; Essential for bone   | 0.469 |
| MMP9 | CASP3    | ENSP00000 | ENSP00000 | Matrix metalloproteinase-9; May play a | Caspase-3; Involved in the activation cas  | 0.772 |
| MMP9 | CD38     | ENSP00000 | ENSP00000 | Matrix metalloproteinase-9; May play a | ADP-ribosyl cyclase/cyclic ADP-ribose h    | 0.449 |
| MMP9 | FN1      | ENSP00000 | ENSP00000 | Matrix metalloproteinase-9; May play a | Fibronectin 1; Fibronectin type III domai  | 0.608 |
| MMP9 | HRAS     | ENSP00000 | ENSP00000 | Matrix metalloproteinase-9; May play a | GTPase HRas; Involved in the activation    | 0.6   |
| MMP9 | HSP90AA1 | ENSP00000 | ENSP00000 | Matrix metalloproteinase-9; May play a | Heat shock protein HSP 90-alpha; Molec     | 0.452 |
| MMP9 | IL2      | ENSP00000 | ENSP00000 | Matrix metalloproteinase-9; May play a | Interleukin-2; Produced by T-cells in res  | 0.56  |
| MMP9 | KDR      | ENSP00000 | ENSP00000 | Matrix metalloproteinase-9; May play a | Vascular endothelial growth factor recep   | 0.76  |

|        |          |           |           |                                         |                                            |       |
|--------|----------|-----------|-----------|-----------------------------------------|--------------------------------------------|-------|
| MMP9   | KLK3     | ENSP00000 | ENSP00000 | Matrix metalloproteinase-9; May play a  | Kallikrein related peptidase 3; Prostate-s | 0.459 |
| MMP9   | LGALS3   | ENSP00000 | ENSP00000 | Matrix metalloproteinase-9; May play a  | Galectin-3; Galactose-specific lectin whi  | 0.729 |
| MMP9   | MAPK14   | ENSP00000 | ENSP00000 | Matrix metalloproteinase-9; May play a  | Mitogen-activated protein kinase 14; Ser   | 0.571 |
| MMP9   | MET      | ENSP00000 | ENSP00000 | Matrix metalloproteinase-9; May play a  | Hepatocyte growth factor receptor; Rece    | 0.57  |
| MMP9   | MMP12    | ENSP00000 | ENSP00000 | Matrix metalloproteinase-9; May play a  | Matrix metalloproteinase-12 (macropha      | 0.724 |
| MMP9   | MMP13    | ENSP00000 | ENSP00000 | Matrix metalloproteinase-9; May play a  | Matrix metalloproteinase-13 (collagenas    | 0.436 |
| MMP9   | MMP2     | ENSP00000 | ENSP00000 | Matrix metalloproteinase-9; May play a  | Matrix metalloproteinase-2 (gelatinase a   | 0.908 |
| MMP9   | MMP8     | ENSP00000 | ENSP00000 | Matrix metalloproteinase-9; May play a  | Matrix metalloproteinase-8 (neutrophil c   | 0.651 |
| MMP9   | PPARG    | ENSP00000 | ENSP00000 | Matrix metalloproteinase-9; May play a  | Peroxisome proliferator-activated recept   | 0.652 |
| MMP9   | PRKCD    | ENSP00000 | ENSP00000 | Matrix metalloproteinase-9; May play a  | Protein kinase C delta type; Calcium-ind   | 0.414 |
| MMP9   | PTGS2    | ENSP00000 | ENSP00000 | Matrix metalloproteinase-9; May play a  | Prostaglandin G/H synthase 2; Converts     | 0.76  |
| MMP9   | SRC      | ENSP00000 | ENSP00000 | Matrix metalloproteinase-9; May play a  | Proto-oncogene tyrosine-protein kinase     | 0.97  |
| MMP9   | TLR9     | ENSP00000 | ENSP00000 | Matrix metalloproteinase-9; May play a  | Toll-like receptor 9; Key component of i   | 0.432 |
| MMP9   | TNF      | ENSP00000 | ENSP00000 | Matrix metalloproteinase-9; May play a  | Tumor necrosis factor; Cytokine that bin   | 0.89  |
| MMP9   | TYMP     | ENSP00000 | ENSP00000 | Matrix metalloproteinase-9; May play a  | Thymidine phosphorylase; May have a r      | 0.456 |
| PIK3CA | AURKA    | ENSP00000 | ENSP00000 | Phosphatidylinositol 4,5-bisphosphate 3 | Aurora kinase A; Mitotic serine/threonin   | 0.504 |
| PIK3CA | CASP3    | ENSP00000 | ENSP00000 | Phosphatidylinositol 4,5-bisphosphate 3 | Caspase-3; Involved in the activation cas  | 0.53  |
| PIK3CA | HRAS     | ENSP00000 | ENSP00000 | Phosphatidylinositol 4,5-bisphosphate 3 | GTPase HRas; Involved in the activation    | 0.999 |
| PIK3CA | HSP90AA1 | ENSP00000 | ENSP00000 | Phosphatidylinositol 4,5-bisphosphate 3 | Heat shock protein HSP 90-alpha; Molec     | 0.88  |
| PIK3CA | IL2      | ENSP00000 | ENSP00000 | Phosphatidylinositol 4,5-bisphosphate 3 | Interleukin-2; Produced by T-cells in res  | 0.919 |
| PIK3CA | KDR      | ENSP00000 | ENSP00000 | Phosphatidylinositol 4,5-bisphosphate 3 | Vascular endothelial growth factor recep   | 0.976 |
| PIK3CA | MAPK14   | ENSP00000 | ENSP00000 | Phosphatidylinositol 4,5-bisphosphate 3 | Mitogen-activated protein kinase 14; Ser   | 0.403 |
| PIK3CA | MET      | ENSP00000 | ENSP00000 | Phosphatidylinositol 4,5-bisphosphate 3 | Hepatocyte growth factor receptor; Rece    | 0.976 |
| PIK3CA | MGMT     | ENSP00000 | ENSP00000 | Phosphatidylinositol 4,5-bisphosphate 3 | Methylated-dna-[protein]-cysteine s-m      | 0.472 |
| PIK3CA | PIK3CG   | ENSP00000 | ENSP00000 | Phosphatidylinositol 4,5-bisphosphate 3 | Phosphatidylinositol 4,5-bisphosphate 3    | 0.919 |
| PIK3CA | PRKCD    | ENSP00000 | ENSP00000 | Phosphatidylinositol 4,5-bisphosphate 3 | Protein kinase C delta type; Calcium-ind   | 0.939 |
| PIK3CA | PTGS2    | ENSP00000 | ENSP00000 | Phosphatidylinositol 4,5-bisphosphate 3 | Prostaglandin G/H synthase 2; Converts     | 0.403 |
| PIK3CA | RET      | ENSP00000 | ENSP00000 | Phosphatidylinositol 4,5-bisphosphate 3 | Proto-oncogene tyrosine-protein kinase     | 0.971 |
| PIK3CA | SRC      | ENSP00000 | ENSP00000 | Phosphatidylinositol 4,5-bisphosphate 3 | Proto-oncogene tyrosine-protein kinase     | 0.971 |
| PIK3CG | HRAS     | ENSP00000 | ENSP00000 | Phosphatidylinositol 4,5-bisphosphate 3 | GTPase HRas; Involved in the activation    | 0.998 |
| PIK3CG | KDR      | ENSP00000 | ENSP00000 | Phosphatidylinositol 4,5-bisphosphate 3 | Vascular endothelial growth factor recep   | 0.52  |

|        |          |           |           |                                          |                                           |       |
|--------|----------|-----------|-----------|------------------------------------------|-------------------------------------------|-------|
| PIK3CG | MAPK14   | ENSP00000 | ENSP00000 | Phosphatidylinositol 4,5-bisphosphate 3  | Mitogen-activated protein kinase 14; Ser  | 0.409 |
| PIK3CG | PIK3CA   | ENSP00000 | ENSP00000 | Phosphatidylinositol 4,5-bisphosphate 3  | Phosphatidylinositol 4,5-bisphosphate 3   | 0.919 |
| PIK3CG | PRKCB    | ENSP00000 | ENSP00000 | Phosphatidylinositol 4,5-bisphosphate 3  | Protein kinase C beta type; Calcium-acti  | 0.688 |
| PIK3CG | SRC      | ENSP00000 | ENSP00000 | Phosphatidylinositol 4,5-bisphosphate 3  | Proto-oncogene tyrosine-protein kinase    | 0.826 |
| PIK3CG | TNF      | ENSP00000 | ENSP00000 | Phosphatidylinositol 4,5-bisphosphate 3  | Tumor necrosis factor; Cytokine that bin  | 0.474 |
| PPARG  | ALB      | ENSP00000 | ENSP00000 | Peroxisome proliferator-activated recep  | Serum albumin; Serum albumin, the mai     | 0.737 |
| PPARG  | ALOX5    | ENSP00000 | ENSP00000 | Peroxisome proliferator-activated recep  | Arachidonate 5-lipoxygenase; Catalyzes    | 0.676 |
| PPARG  | CASP3    | ENSP00000 | ENSP00000 | Peroxisome proliferator-activated recep  | Caspase-3; Involved in the activation cas | 0.644 |
| PPARG  | FN1      | ENSP00000 | ENSP00000 | Peroxisome proliferator-activated recep  | Fibronectin 1; Fibronectin type III domai | 0.567 |
| PPARG  | GPR55    | ENSP00000 | ENSP00000 | Peroxisome proliferator-activated recep  | G protein-coupled receptor 55; G-protei   | 0.522 |
| PPARG  | HCAR2    | ENSP00000 | ENSP00000 | Peroxisome proliferator-activated recep  | Hydroxycarboxylic acid receptor 2; Acts a | 0.545 |
| PPARG  | HRAS     | ENSP00000 | ENSP00000 | Peroxisome proliferator-activated recep  | GTPase HRas; Involved in the activation   | 0.544 |
| PPARG  | HSP90AA1 | ENSP00000 | ENSP00000 | Peroxisome proliferator-activated recep  | Heat shock protein HSP 90-alpha; Molec    | 0.782 |
| PPARG  | IL2      | ENSP00000 | ENSP00000 | Peroxisome proliferator-activated recep  | Interleukin-2; Produced by T-cells in res | 0.459 |
| PPARG  | KDR      | ENSP00000 | ENSP00000 | Peroxisome proliferator-activated recep  | Vascular endothelial growth factor recep  | 0.476 |
| PPARG  | LGALS3   | ENSP00000 | ENSP00000 | Peroxisome proliferator-activated recep  | Galectin-3; Galactose-specific lectin whi | 0.472 |
| PPARG  | LGALS4   | ENSP00000 | ENSP00000 | Peroxisome proliferator-activated recep  | Galectin-4; Galectin that binds lactose a | 0.973 |
| PPARG  | MAPK14   | ENSP00000 | ENSP00000 | Peroxisome proliferator-activated recep  | Mitogen-activated protein kinase 14; Ser  | 0.678 |
| PPARG  | MMP13    | ENSP00000 | ENSP00000 | Peroxisome proliferator-activated recep  | Matrix metalloproteinase-13 (collagenas   | 0.4   |
| PPARG  | MMP2     | ENSP00000 | ENSP00000 | Peroxisome proliferator-activated recep  | Matrix metalloproteinase-2 (gelatinase a  | 0.514 |
| PPARG  | MMP9     | ENSP00000 | ENSP00000 | Peroxisome proliferator-activated recep  | Matrix metalloproteinase-9; May play an   | 0.652 |
| PPARG  | PTGS1    | ENSP00000 | ENSP00000 | Peroxisome proliferator-activated recep  | Prostaglandin G/H synthase 1; Converts    | 0.525 |
| PPARG  | PTGS2    | ENSP00000 | ENSP00000 | Peroxisome proliferator-activated recep  | Prostaglandin G/H synthase 2; Converts    | 0.862 |
| PPARG  | RET      | ENSP00000 | ENSP00000 | Peroxisome proliferator-activated recep  | Proto-oncogene tyrosine-protein kinase    | 0.602 |
| PPARG  | SRC      | ENSP00000 | ENSP00000 | Peroxisome proliferator-activated recep  | Proto-oncogene tyrosine-protein kinase    | 0.739 |
| PPARG  | TNF      | ENSP00000 | ENSP00000 | Peroxisome proliferator-activated recep  | Tumor necrosis factor; Cytokine that bin  | 0.979 |
| PPARG  | XDH      | ENSP00000 | ENSP00000 | Peroxisome proliferator-activated recep  | Xanthine dehydrogenase/oxidase; Key e     | 0.438 |
| PRKCB  | ADRA2A   | ENSP00000 | ENSP00000 | Protein kinase C beta type; Calcium-acti | Alpha-2A adrenergic receptor; Alpha-2     | 0.663 |
| PRKCB  | CASP3    | ENSP00000 | ENSP00000 | Protein kinase C beta type; Calcium-acti | Caspase-3; Involved in the activation cas | 0.855 |
| PRKCB  | CD38     | ENSP00000 | ENSP00000 | Protein kinase C beta type; Calcium-acti | ADP-ribosyl cyclase/cyclic ADP-ribose h   | 0.837 |
| PRKCB  | HRAS     | ENSP00000 | ENSP00000 | Protein kinase C beta type; Calcium-acti | GTPase HRas; Involved in the activation   | 0.931 |

|       |          |           |           |                                          |                                            |       |
|-------|----------|-----------|-----------|------------------------------------------|--------------------------------------------|-------|
| PRKCB | IL2      | ENSP00000 | ENSP00000 | Protein kinase C beta type; Calcium-acti | Interleukin-2; Produced by T-cells in res  | 0.916 |
| PRKCB | PIK3CG   | ENSP00000 | ENSP00000 | Protein kinase C beta type; Calcium-acti | Phosphatidylinositol 4,5-bisphosphate 3    | 0.688 |
| PRKCB | PRKCD    | ENSP00000 | ENSP00000 | Protein kinase C beta type; Calcium-acti | Protein kinase C delta type; Calcium-ind   | 0.858 |
| PRKCB | SRC      | ENSP00000 | ENSP00000 | Protein kinase C beta type; Calcium-acti | Proto-oncogene tyrosine-protein kinase     | 0.92  |
| PRKCD | ADRA2A   | ENSP00000 | ENSP00000 | Protein kinase C delta type; Calcium-in  | Alpha-2A adrenergic receptor; Alpha-2      | 0.732 |
| PRKCD | CASP3    | ENSP00000 | ENSP00000 | Protein kinase C delta type; Calcium-in  | Caspase-3; Involved in the activation cas  | 0.984 |
| PRKCD | HRAS     | ENSP00000 | ENSP00000 | Protein kinase C delta type; Calcium-in  | GTPase HRas; Involved in the activation    | 0.945 |
| PRKCD | HSP90AA1 | ENSP00000 | ENSP00000 | Protein kinase C delta type; Calcium-in  | Heat shock protein HSP 90-alpha; Molec     | 0.858 |
| PRKCD | MMP9     | ENSP00000 | ENSP00000 | Protein kinase C delta type; Calcium-in  | Matrix metalloproteinase-9; May play an    | 0.414 |
| PRKCD | PIK3CA   | ENSP00000 | ENSP00000 | Protein kinase C delta type; Calcium-in  | Phosphatidylinositol 4,5-bisphosphate 3    | 0.939 |
| PRKCD | PRKCB    | ENSP00000 | ENSP00000 | Protein kinase C delta type; Calcium-in  | Protein kinase C beta type; Calcium-acti   | 0.858 |
| PRKCD | PTGS2    | ENSP00000 | ENSP00000 | Protein kinase C delta type; Calcium-in  | Prostaglandin G/H synthase 2; Converts     | 0.413 |
| PRKCD | SRC      | ENSP00000 | ENSP00000 | Protein kinase C delta type; Calcium-in  | Proto-oncogene tyrosine-protein kinase     | 0.971 |
| PRKCD | TNF      | ENSP00000 | ENSP00000 | Protein kinase C delta type; Calcium-in  | Tumor necrosis factor; Cytokine that bin   | 0.53  |
| PTGS1 | ALOX5    | ENSP00000 | ENSP00000 | Prostaglandin G/H synthase 1; Converts   | Arachidonate 5-lipoxygenase; Catalyzes     | 0.973 |
| PTGS1 | PPARG    | ENSP00000 | ENSP00000 | Prostaglandin G/H synthase 1; Converts   | Peroxisome proliferator-activated recept   | 0.525 |
| PTGS1 | PTGS2    | ENSP00000 | ENSP00000 | Prostaglandin G/H synthase 1; Converts   | Prostaglandin G/H synthase 2; Converts     | 0.869 |
| PTGS1 | TNF      | ENSP00000 | ENSP00000 | Prostaglandin G/H synthase 1; Converts   | Tumor necrosis factor; Cytokine that bin   | 0.569 |
| PTGS2 | ABCB1    | ENSP00000 | ENSP00000 | Prostaglandin G/H synthase 2; Converts   | Multidrug resistance protein 1; Energy-d   | 0.426 |
| PTGS2 | ACHE     | ENSP00000 | ENSP00000 | Prostaglandin G/H synthase 2; Converts   | Acetylcholinesterase (cartwright blood g   | 0.477 |
| PTGS2 | ALB      | ENSP00000 | ENSP00000 | Prostaglandin G/H synthase 2; Converts   | Serum albumin; Serum albumin, the mai      | 0.703 |
| PTGS2 | ALOX5    | ENSP00000 | ENSP00000 | Prostaglandin G/H synthase 2; Converts   | Arachidonate 5-lipoxygenase; Catalyzes     | 0.982 |
| PTGS2 | CASP3    | ENSP00000 | ENSP00000 | Prostaglandin G/H synthase 2; Converts   | Caspase-3; Involved in the activation cas  | 0.721 |
| PTGS2 | FN1      | ENSP00000 | ENSP00000 | Prostaglandin G/H synthase 2; Converts   | Fibronectin 1; Fibronectin type III domai  | 0.654 |
| PTGS2 | GPR55    | ENSP00000 | ENSP00000 | Prostaglandin G/H synthase 2; Converts   | G protein-coupled receptor 55; G-protei    | 0.415 |
| PTGS2 | HRAS     | ENSP00000 | ENSP00000 | Prostaglandin G/H synthase 2; Converts   | GTPase HRas; Involved in the activation    | 0.58  |
| PTGS2 | HSP90AA1 | ENSP00000 | ENSP00000 | Prostaglandin G/H synthase 2; Converts   | Heat shock protein HSP 90-alpha; Molec     | 0.429 |
| PTGS2 | IL2      | ENSP00000 | ENSP00000 | Prostaglandin G/H synthase 2; Converts   | Interleukin-2; Produced by T-cells in res  | 0.577 |
| PTGS2 | KDR      | ENSP00000 | ENSP00000 | Prostaglandin G/H synthase 2; Converts   | Vascular endothelial growth factor recep   | 0.477 |
| PTGS2 | KLK3     | ENSP00000 | ENSP00000 | Prostaglandin G/H synthase 2; Converts   | Kallikrein related peptidase 3; Prostate-s | 0.411 |
| PTGS2 | MAPK14   | ENSP00000 | ENSP00000 | Prostaglandin G/H synthase 2; Converts   | Mitogen-activated protein kinase 14; Ser   | 0.633 |

|        |          |           |           |                                        |                                           |       |
|--------|----------|-----------|-----------|----------------------------------------|-------------------------------------------|-------|
| PTGS2  | MET      | ENSP00000 | ENSP00000 | Prostaglandin G/H synthase 2; Converts | Hepatocyte growth factor receptor; Rece   | 0.477 |
| PTGS2  | MMP12    | ENSP00000 | ENSP00000 | Prostaglandin G/H synthase 2; Converts | Matrix metalloproteinase-12 (macropha     | 0.405 |
| PTGS2  | MMP13    | ENSP00000 | ENSP00000 | Prostaglandin G/H synthase 2; Converts | Matrix metalloproteinase-13 (collagenas   | 0.636 |
| PTGS2  | MMP2     | ENSP00000 | ENSP00000 | Prostaglandin G/H synthase 2; Converts | Matrix metalloproteinase-2 (gelatinase a  | 0.663 |
| PTGS2  | MMP8     | ENSP00000 | ENSP00000 | Prostaglandin G/H synthase 2; Converts | Matrix metalloproteinase-8 (neutrophil c  | 0.525 |
| PTGS2  | MMP9     | ENSP00000 | ENSP00000 | Prostaglandin G/H synthase 2; Converts | Matrix metalloproteinase-9; May play an   | 0.76  |
| PTGS2  | PIK3CA   | ENSP00000 | ENSP00000 | Prostaglandin G/H synthase 2; Converts | Phosphatidylinositol 4,5-bisphosphate 3   | 0.403 |
| PTGS2  | PPARG    | ENSP00000 | ENSP00000 | Prostaglandin G/H synthase 2; Converts | Peroxisome proliferator-activated recept  | 0.862 |
| PTGS2  | PRKCD    | ENSP00000 | ENSP00000 | Prostaglandin G/H synthase 2; Converts | Protein kinase C delta type; Calcium-ind  | 0.413 |
| PTGS2  | PTGS1    | ENSP00000 | ENSP00000 | Prostaglandin G/H synthase 2; Converts | Prostaglandin G/H synthase 1; Converts    | 0.869 |
| PTGS2  | SRC      | ENSP00000 | ENSP00000 | Prostaglandin G/H synthase 2; Converts | Proto-oncogene tyrosine-protein kinase    | 0.657 |
| PTGS2  | TLR9     | ENSP00000 | ENSP00000 | Prostaglandin G/H synthase 2; Converts | Toll-like receptor 9; Key component of i  | 0.418 |
| PTGS2  | TNF      | ENSP00000 | ENSP00000 | Prostaglandin G/H synthase 2; Converts | Tumor necrosis factor; Cytokine that bin  | 0.863 |
| PTPN2  | IL2      | ENSP00000 | ENSP00000 | Tyrosine-protein phosphatase non-rece  | Interleukin-2; Produced by T-cells in res | 0.569 |
| PTPN2  | KDR      | ENSP00000 | ENSP00000 | Tyrosine-protein phosphatase non-rece  | Vascular endothelial growth factor recep  | 0.917 |
| PTPN2  | MET      | ENSP00000 | ENSP00000 | Tyrosine-protein phosphatase non-rece  | Hepatocyte growth factor receptor; Rece   | 0.92  |
| PTPN2  | PTPRS    | ENSP00000 | ENSP00000 | Tyrosine-protein phosphatase non-rece  | Receptor-type tyrosine-protein phosph     | 0.484 |
| PTPN2  | SRC      | ENSP00000 | ENSP00000 | Tyrosine-protein phosphatase non-rece  | Proto-oncogene tyrosine-protein kinase    | 0.963 |
| PTPN22 | GPR55    | ENSP00000 | ENSP00000 | Tyrosine-protein phosphatase non-rece  | G protein-coupled receptor 55; G-protei   | 0.42  |
| PTPN22 | IL2      | ENSP00000 | ENSP00000 | Tyrosine-protein phosphatase non-rece  | Interleukin-2; Produced by T-cells in res | 0.529 |
| PTPN22 | SRC      | ENSP00000 | ENSP00000 | Tyrosine-protein phosphatase non-rece  | Proto-oncogene tyrosine-protein kinase    | 0.977 |
| PTPN22 | TLR9     | ENSP00000 | ENSP00000 | Tyrosine-protein phosphatase non-rece  | Toll-like receptor 9; Key component of i  | 0.431 |
| PTPN22 | TNF      | ENSP00000 | ENSP00000 | Tyrosine-protein phosphatase non-rece  | Tumor necrosis factor; Cytokine that bin  | 0.541 |
| PTPRS  | PTPN2    | ENSP00000 | ENSP00000 | Receptor-type tyrosine-protein phosph  | Tyrosine-protein phosphatase non-rece     | 0.484 |
| PTPRS  | RET      | ENSP00000 | ENSP00000 | Receptor-type tyrosine-protein phosph  | Proto-oncogene tyrosine-protein kinase    | 0.446 |
| PTPRS  | SRC      | ENSP00000 | ENSP00000 | Receptor-type tyrosine-protein phosph  | Proto-oncogene tyrosine-protein kinase    | 0.426 |
| RET    | ALB      | ENSP00000 | ENSP00000 | Proto-oncogene tyrosine-protein kinas  | Serum albumin; Serum albumin, the mai     | 0.406 |
| RET    | CASP3    | ENSP00000 | ENSP00000 | Proto-oncogene tyrosine-protein kinas  | Caspase-3; Involved in the activation cas | 0.619 |
| RET    | HRAS     | ENSP00000 | ENSP00000 | Proto-oncogene tyrosine-protein kinas  | GTPase HRas; Involved in the activation   | 0.984 |
| RET    | HSP90AA1 | ENSP00000 | ENSP00000 | Proto-oncogene tyrosine-protein kinas  | Heat shock protein HSP 90-alpha; Molec    | 0.723 |
| RET    | KDR      | ENSP00000 | ENSP00000 | Proto-oncogene tyrosine-protein kinas  | Vascular endothelial growth factor recep  | 0.466 |



|     |          |           |           |                                       |                                            |       |
|-----|----------|-----------|-----------|---------------------------------------|--------------------------------------------|-------|
| RET | LGALS3   | ENSP00000 | ENSP00000 | Proto-oncogene tyrosine-protein kinas | Galectin-3; Galactose-specific lectin whi  | 0.414 |
| RET | MET      | ENSP00000 | ENSP00000 | Proto-oncogene tyrosine-protein kinas | Hepatocyte growth factor receptor; Rece    | 0.474 |
| RET | PIK3CA   | ENSP00000 | ENSP00000 | Proto-oncogene tyrosine-protein kinas | Phosphatidylinositol 4,5-bisphosphate 3    | 0.971 |
| RET | PPARG    | ENSP00000 | ENSP00000 | Proto-oncogene tyrosine-protein kinas | Peroxisome proliferator-activated recept   | 0.602 |
| RET | PTPRS    | ENSP00000 | ENSP00000 | Proto-oncogene tyrosine-protein kinas | Receptor-type tyrosine-protein phospho     | 0.446 |
| RET | SRC      | ENSP00000 | ENSP00000 | Proto-oncogene tyrosine-protein kinas | Proto-oncogene tyrosine-protein kinase     | 0.958 |
| SRC | ABCB1    | ENSP00000 | ENSP00000 | Proto-oncogene tyrosine-protein kinas | Multidrug resistance protein 1; Energy-d   | 0.407 |
| SRC | ALB      | ENSP00000 | ENSP00000 | Proto-oncogene tyrosine-protein kinas | Serum albumin; Serum albumin, the mai      | 0.695 |
| SRC | CASP3    | ENSP00000 | ENSP00000 | Proto-oncogene tyrosine-protein kinas | Caspase-3; Involved in the activation cas  | 0.689 |
| SRC | FN1      | ENSP00000 | ENSP00000 | Proto-oncogene tyrosine-protein kinas | Fibronectin 1; Fibronectin type III domai  | 0.981 |
| SRC | HRAS     | ENSP00000 | ENSP00000 | Proto-oncogene tyrosine-protein kinas | GTPase HRas; Involved in the activation    | 0.996 |
| SRC | HSP90AA1 | ENSP00000 | ENSP00000 | Proto-oncogene tyrosine-protein kinas | Heat shock protein HSP 90-alpha; Molec     | 0.999 |
| SRC | IL2      | ENSP00000 | ENSP00000 | Proto-oncogene tyrosine-protein kinas | Interleukin-2; Produced by T-cells in res  | 0.561 |
| SRC | ITGAL    | ENSP00000 | ENSP00000 | Proto-oncogene tyrosine-protein kinas | Integrin subunit alpha I; Integrin alpha-L | 0.708 |
| SRC | KDR      | ENSP00000 | ENSP00000 | Proto-oncogene tyrosine-protein kinas | Vascular endothelial growth factor recep   | 0.992 |
| SRC | KLK3     | ENSP00000 | ENSP00000 | Proto-oncogene tyrosine-protein kinas | Kallikrein related peptidase 3; Prostate-s | 0.413 |
| SRC | LGALS3   | ENSP00000 | ENSP00000 | Proto-oncogene tyrosine-protein kinas | Galectin-3; Galactose-specific lectin whi  | 0.555 |
| SRC | LGALS4   | ENSP00000 | ENSP00000 | Proto-oncogene tyrosine-protein kinas | Galectin-4; Galectin that binds lactose a  | 0.426 |
| SRC | MAPK14   | ENSP00000 | ENSP00000 | Proto-oncogene tyrosine-protein kinas | Mitogen-activated protein kinase 14; Ser   | 0.939 |
| SRC | MET      | ENSP00000 | ENSP00000 | Proto-oncogene tyrosine-protein kinas | Hepatocyte growth factor receptor; Rece    | 0.982 |
| SRC | MMP2     | ENSP00000 | ENSP00000 | Proto-oncogene tyrosine-protein kinas | Matrix metalloproteinase-2 (gelatinase a   | 0.96  |
| SRC | MMP9     | ENSP00000 | ENSP00000 | Proto-oncogene tyrosine-protein kinas | Matrix metalloproteinase-9; May play an    | 0.97  |
| SRC | PIK3CA   | ENSP00000 | ENSP00000 | Proto-oncogene tyrosine-protein kinas | Phosphatidylinositol 4,5-bisphosphate 3    | 0.971 |
| SRC | PIK3CG   | ENSP00000 | ENSP00000 | Proto-oncogene tyrosine-protein kinas | Phosphatidylinositol 4,5-bisphosphate 3    | 0.826 |
| SRC | PPARG    | ENSP00000 | ENSP00000 | Proto-oncogene tyrosine-protein kinas | Peroxisome proliferator-activated recept   | 0.739 |
| SRC | PRKCB    | ENSP00000 | ENSP00000 | Proto-oncogene tyrosine-protein kinas | Protein kinase C beta type; Calcium-acti   | 0.92  |
| SRC | PRKCD    | ENSP00000 | ENSP00000 | Proto-oncogene tyrosine-protein kinas | Protein kinase C delta type; Calcium-ind   | 0.971 |
| SRC | PTGS2    | ENSP00000 | ENSP00000 | Proto-oncogene tyrosine-protein kinas | Prostaglandin G/H synthase 2; Converts     | 0.657 |
| SRC | PTPN2    | ENSP00000 | ENSP00000 | Proto-oncogene tyrosine-protein kinas | Tyrosine-protein phosphatase non-rece      | 0.963 |
| SRC | PTPN22   | ENSP00000 | ENSP00000 | Proto-oncogene tyrosine-protein kinas | Tyrosine-protein phosphatase non-rece      | 0.977 |
| SRC | PTPRS    | ENSP00000 | ENSP00000 | Proto-oncogene tyrosine-protein kinas | Receptor-type tyrosine-protein phospho     | 0.426 |

|      |          |           |           |                                          |                                            |       |
|------|----------|-----------|-----------|------------------------------------------|--------------------------------------------|-------|
| SRC  | RET      | ENSP00000 | ENSP00000 | Proto-oncogene tyrosine-protein kinas    | Proto-oncogene tyrosine-protein kinase     | 0.958 |
| SRC  | TLR9     | ENSP00000 | ENSP00000 | Proto-oncogene tyrosine-protein kinas    | Toll-like receptor 9; Key component of i   | 0.571 |
| SRC  | TNF      | ENSP00000 | ENSP00000 | Proto-oncogene tyrosine-protein kinas    | Tumor necrosis factor; Cytokine that bin   | 0.696 |
| TLR9 | ALB      | ENSP00000 | ENSP00000 | Toll-like receptor 9; Key component of i | Serum albumin; Serum albumin, the mai      | 0.548 |
| TLR9 | CASP3    | ENSP00000 | ENSP00000 | Toll-like receptor 9; Key component of i | Caspase-3; Involved in the activation cas  | 0.414 |
| TLR9 | CD38     | ENSP00000 | ENSP00000 | Toll-like receptor 9; Key component of i | ADP-ribosyl cyclase/cyclic ADP-ribose h    | 0.482 |
| TLR9 | FN1      | ENSP00000 | ENSP00000 | Toll-like receptor 9; Key component of i | Fibronectin 1; Fibronectin type III domai  | 0.404 |
| TLR9 | HRAS     | ENSP00000 | ENSP00000 | Toll-like receptor 9; Key component of i | GTPase HRas; Involved in the activation    | 0.414 |
| TLR9 | IL2      | ENSP00000 | ENSP00000 | Toll-like receptor 9; Key component of i | Interleukin-2; Produced by T-cells in res  | 0.684 |
| TLR9 | MAPK14   | ENSP00000 | ENSP00000 | Toll-like receptor 9; Key component of i | Mitogen-activated protein kinase 14; Ser   | 0.468 |
| TLR9 | MMP9     | ENSP00000 | ENSP00000 | Toll-like receptor 9; Key component of i | Matrix metalloproteinase-9; May play an    | 0.432 |
| TLR9 | PTGS2    | ENSP00000 | ENSP00000 | Toll-like receptor 9; Key component of i | Prostaglandin G/H synthase 2; Converts     | 0.418 |
| TLR9 | PTPN22   | ENSP00000 | ENSP00000 | Toll-like receptor 9; Key component of i | Tyrosine-protein phosphatase non-rece      | 0.431 |
| TLR9 | SRC      | ENSP00000 | ENSP00000 | Toll-like receptor 9; Key component of i | Proto-oncogene tyrosine-protein kinase     | 0.571 |
| TLR9 | TNF      | ENSP00000 | ENSP00000 | Toll-like receptor 9; Key component of i | Tumor necrosis factor; Cytokine that bin   | 0.859 |
| TNF  | ABCB1    | ENSP00000 | ENSP00000 | Tumor necrosis factor; Cytokine that bin | Multidrug resistance protein 1; Energy-d   | 0.455 |
| TNF  | ACHE     | ENSP00000 | ENSP00000 | Tumor necrosis factor; Cytokine that bin | Acetylcholinesterase (cartwright blood g   | 0.521 |
| TNF  | ADORA3   | ENSP00000 | ENSP00000 | Tumor necrosis factor; Cytokine that bin | Transmembrane domain-containing pro        | 0.53  |
| TNF  | ALB      | ENSP00000 | ENSP00000 | Tumor necrosis factor; Cytokine that bin | Serum albumin; Serum albumin, the mai      | 0.866 |
| TNF  | ALOX5    | ENSP00000 | ENSP00000 | Tumor necrosis factor; Cytokine that bin | Arachidonate 5-lipoxygenase; Catalyzes     | 0.652 |
| TNF  | CASP3    | ENSP00000 | ENSP00000 | Tumor necrosis factor; Cytokine that bin | Caspase-3; Involved in the activation cas  | 0.896 |
| TNF  | CD38     | ENSP00000 | ENSP00000 | Tumor necrosis factor; Cytokine that bin | ADP-ribosyl cyclase/cyclic ADP-ribose h    | 0.64  |
| TNF  | FN1      | ENSP00000 | ENSP00000 | Tumor necrosis factor; Cytokine that bin | Fibronectin 1; Fibronectin type III domai  | 0.93  |
| TNF  | HCAR2    | ENSP00000 | ENSP00000 | Tumor necrosis factor; Cytokine that bin | Hydroxycarboxylic acid receptor 2; Acts a  | 0.486 |
| TNF  | HRAS     | ENSP00000 | ENSP00000 | Tumor necrosis factor; Cytokine that bin | GTPase HRas; Involved in the activation    | 0.623 |
| TNF  | HSP90AA1 | ENSP00000 | ENSP00000 | Tumor necrosis factor; Cytokine that bin | Heat shock protein HSP 90-alpha; Molec     | 0.572 |
| TNF  | IL2      | ENSP00000 | ENSP00000 | Tumor necrosis factor; Cytokine that bin | Interleukin-2; Produced by T-cells in res  | 0.933 |
| TNF  | ITGAL    | ENSP00000 | ENSP00000 | Tumor necrosis factor; Cytokine that bin | Integrin subunit alpha I; Integrin alpha-L | 0.692 |
| TNF  | KDR      | ENSP00000 | ENSP00000 | Tumor necrosis factor; Cytokine that bin | Vascular endothelial growth factor recep   | 0.623 |
| TNF  | KLK3     | ENSP00000 | ENSP00000 | Tumor necrosis factor; Cytokine that bin | Kallikrein related peptidase 3; Prostate-s | 0.403 |
| TNF  | LGALS3   | ENSP00000 | ENSP00000 | Tumor necrosis factor; Cytokine that bin | Galectin-3; Galactose-specific lectin whi  | 0.624 |

|      |         |           |           |                                          |                                           |       |
|------|---------|-----------|-----------|------------------------------------------|-------------------------------------------|-------|
| TNF  | LGALS9  | ENSP00000 | ENSP00000 | Tumor necrosis factor; Cytokine that bin | Galectin-9; Binds galactosides. Has high  | 0.555 |
| TNF  | MAP3K14 | ENSP00000 | ENSP00000 | Tumor necrosis factor; Cytokine that bin | Mitogen-activated protein kinase kinase   | 0.924 |
| TNF  | MAPK14  | ENSP00000 | ENSP00000 | Tumor necrosis factor; Cytokine that bin | Mitogen-activated protein kinase 14; Ser  | 0.975 |
| TNF  | MET     | ENSP00000 | ENSP00000 | Tumor necrosis factor; Cytokine that bin | Hepatocyte growth factor receptor; Rece   | 0.487 |
| TNF  | MMP12   | ENSP00000 | ENSP00000 | Tumor necrosis factor; Cytokine that bin | Matrix metalloproteinase-12 (macropha     | 0.586 |
| TNF  | MMP13   | ENSP00000 | ENSP00000 | Tumor necrosis factor; Cytokine that bin | Matrix metalloproteinase-13 (collagenas   | 0.721 |
| TNF  | MMP2    | ENSP00000 | ENSP00000 | Tumor necrosis factor; Cytokine that bin | Matrix metalloproteinase-2 (gelatinase a  | 0.734 |
| TNF  | MMP8    | ENSP00000 | ENSP00000 | Tumor necrosis factor; Cytokine that bin | Matrix metalloproteinase-8 (neutrophil c  | 0.675 |
| TNF  | MMP9    | ENSP00000 | ENSP00000 | Tumor necrosis factor; Cytokine that bin | Matrix metalloproteinase-9; May play an   | 0.89  |
| TNF  | PIK3CG  | ENSP00000 | ENSP00000 | Tumor necrosis factor; Cytokine that bin | Phosphatidylinositol 4,5-bisphosphate 3   | 0.474 |
| TNF  | PPARG   | ENSP00000 | ENSP00000 | Tumor necrosis factor; Cytokine that bin | Peroxisome proliferator-activated recept  | 0.979 |
| TNF  | PRKCD   | ENSP00000 | ENSP00000 | Tumor necrosis factor; Cytokine that bin | Protein kinase C delta type; Calcium-ind  | 0.53  |
| TNF  | PTGS1   | ENSP00000 | ENSP00000 | Tumor necrosis factor; Cytokine that bin | Prostaglandin G/H synthase 1; Converts    | 0.569 |
| TNF  | PTGS2   | ENSP00000 | ENSP00000 | Tumor necrosis factor; Cytokine that bin | Prostaglandin G/H synthase 2; Converts    | 0.863 |
| TNF  | PTPN22  | ENSP00000 | ENSP00000 | Tumor necrosis factor; Cytokine that bin | Tyrosine-protein phosphatase non-rece     | 0.541 |
| TNF  | SRC     | ENSP00000 | ENSP00000 | Tumor necrosis factor; Cytokine that bin | Proto-oncogene tyrosine-protein kinase    | 0.696 |
| TNF  | TLR9    | ENSP00000 | ENSP00000 | Tumor necrosis factor; Cytokine that bin | Toll-like receptor 9; Key component of i  | 0.859 |
| TNF  | XDH     | ENSP00000 | ENSP00000 | Tumor necrosis factor; Cytokine that bin | Xanthine dehydrogenase/oxidase; Key e     | 0.505 |
| TYMP | DHFR    | ENSP00000 | ENSP00000 | Thymidine phosphorylase; May have a r    | Dihydrofolate reductase; Key enzyme in f  | 0.495 |
| TYMP | MMP9    | ENSP00000 | ENSP00000 | Thymidine phosphorylase; May have a r    | Matrix metalloproteinase-9; May play an   | 0.456 |
| TYMP | TYMS    | ENSP00000 | ENSP00000 | Thymidine phosphorylase; May have a r    | Thymidylate synthetase; Thymidylate syn   | 0.904 |
| TYMS | ABCB1   | ENSP00000 | ENSP00000 | Thymidylate synthetase; Thymidylate sy   | Multidrug resistance protein 1; Energy-d  | 0.618 |
| TYMS | AURKA   | ENSP00000 | ENSP00000 | Thymidylate synthetase; Thymidylate sy   | Aurora kinase A; Mitotic serine/threonin  | 0.909 |
| TYMS | CASP3   | ENSP00000 | ENSP00000 | Thymidylate synthetase; Thymidylate sy   | Caspase-3; Involved in the activation cas | 0.428 |
| TYMS | DHFR    | ENSP00000 | ENSP00000 | Thymidylate synthetase; Thymidylate sy   | Dihydrofolate reductase; Key enzyme in f  | 0.999 |
| TYMS | HRAS    | ENSP00000 | ENSP00000 | Thymidylate synthetase; Thymidylate sy   | GTPase HRas; Involved in the activation   | 0.569 |
| TYMS | MGMT    | ENSP00000 | ENSP00000 | Thymidylate synthetase; Thymidylate sy   | Methylated-dna-[protein]-cysteine s-m     | 0.419 |
| TYMS | TYMP    | ENSP00000 | ENSP00000 | Thymidylate synthetase; Thymidylate sy   | Thymidine phosphorylase; May have a r     | 0.904 |
| XDH  | ALB     | ENSP00000 | ENSP00000 | Xanthine dehydrogenase/oxidase; Key e    | Serum albumin; Serum albumin, the mai     | 0.424 |
| XDH  | PPARG   | ENSP00000 | ENSP00000 | Xanthine dehydrogenase/oxidase; Key e    | Peroxisome proliferator-activated recept  | 0.438 |
| XDH  | TNF     | ENSP00000 | ENSP00000 | Xanthine dehydrogenase/oxidase; Key e    | Tumor necrosis factor; Cytokine that bin  | 0.505 |
