# Supplementary material
Source: PubMed Central journal article supplement (PMC10226406)
Supplement: PR72_235_tableS3.pdf [file PR72_235_tableS3.pdf]

**Table S3.** Information on GO enrichment analysis

| Category         | Term                                     | Count | Ratio       | P Value  | Genes                                            | FDR      |
|------------------|------------------------------------------|-------|-------------|----------|--------------------------------------------------|----------|
| GOTERM_BP_DIRECT | GO:0009410~response to xenobiotic stim   | 11    | 21.56862745 | 4.85E-10 | RET, HSP90AA1, ABCB1, SRC, MGMT, CASP3, MMP2,    | 5.43E-07 |
| GOTERM_BP_DIRECT | GO:0042493~response to drug              | 10    | 19.60784314 | 5.48E-08 | RET, LGALS1, ABCB1, SRC, MGMT, CASP3, CD38, PPA  | 3.07E-05 |
| GOTERM_BP_DIRECT | GO:0010629~negative regulation of gene   | 10    | 19.60784314 | 8.63E-08 | PIK3CA, KDR, PPARG, PTPN22, LGALS9, MMP8, HRAS,  | 3.22E-05 |
| GOTERM_BP_DIRECT | GO:0051897~positive regulation of protei | 7     | 13.7254902  | 9.88E-07 | RET, HSP90AA1, PIK3CA, SRC, TNF, MET, PIK3CG     | 2.76E-04 |
| GOTERM_BP_DIRECT | GO:0032729~positive regulation of interf | 6     | 11.76470588 | 1.85E-06 | TLR9, PTPN22, LGALS9, HRAS, TNF, IL2             | 4.14E-04 |
| GOTERM_BP_DIRECT | GO:0043410~positive regulation of MAPK   | 7     | 13.7254902  | 3.47E-06 | RET, TLR9, KDR, MMP8, HRAS, TNF, ADRA2A          | 5.25E-04 |
| GOTERM_BP_DIRECT | GO:0001525~angiogenesis                  | 8     | 15.68627451 | 3.67E-06 | PIK3CA, MMP2, FN1, KDR, MAPK14, PTGS2, PIK3CG, T | 5.25E-04 |
| GOTERM_BP_DIRECT | GO:0030574~collagen catabolic process    | 5     | 9.803921569 | 3.75E-06 | MMP12, MMP13, MMP2, MMP8, MMP9                   | 5.25E-04 |
| GOTERM_BP_DIRECT | GO:0042307~positive regulation of protei | 5     | 9.803921569 | 5.00E-06 | HSP90AA1, PRKCD, PTPN22, MAPK14, PTGS2           | 6.22E-04 |
| GOTERM_BP_DIRECT | GO:0022617~extracellular matrix disasse  | 5     | 9.803921569 | 5.99E-06 | MMP12, MMP13, MMP2, MMP8, MMP9                   | 6.71E-04 |
| GOTERM_CC_DIRECT | GO:0005576~extracellular region          | 20    | 39.21568627 | 2.30E-07 | ACHE, HSP90AA1, MMP2, PRKCD, FN1, KLK3, MAPK1    | 3.15E-05 |
| GOTERM_CC_DIRECT | GO:0005615~extracellular space           | 18    | 35.29411765 | 1.62E-06 | ACHE, MMP2, FN1, KLK3, MMP8, TNF, MMP9,          | 1.11E-04 |

|                  |                                         |    |             |             |                                                   |          |
|------------------|-----------------------------------------|----|-------------|-------------|---------------------------------------------------|----------|
|                  |                                         |    |             |             | IL2, M                                            |          |
| GOTERM_CC_DIRECT | GO:0070062~extracellular exosome        | 17 | 33.33333333 | 4.35E-05    | HSP90AA1, PTPRS, ABCB1, PRKCB, SRC, PRKCD, FN1,   | 0.001986 |
| GOTERM_CC_DIRECT | GO:0048471~perinuclear region of cytopl | 10 | 19.60784314 | 8.22E-05    | ACHE, HSP90AA1, PIK3CA, SRC, ALOX5, PRKCD, PPAR   | 0.002598 |
| GOTERM_CC_DIRECT | GO:0005886~plasma membrane              | 26 | 50.98039216 | 9.48E-05    | RET, ACHE, PTPRS, ABCB1, SRC, ITGAL, TNF, PIK3CG, | 0.002598 |
| GOTERM_CC_DIRECT | GO:0009986~cell surface                 | 9  | 17.64705882 | 1.41E-04    | LGALS3, ACHE, HSP90AA1, LGALS1, ABCB1, CD38, ITG  | 0.003223 |
| GOTERM_CC_DIRECT | GO:0005829~cytosol                      | 26 | 50.98039216 | 3.89E-04    | PTPRS, SRC, PTPN22, TYMS, PIK3CG, AURKA, TYMP, L  | 0.007616 |
| GOTERM_CC_DIRECT | GO:0005737~cytoplasm                    | 26 | 50.98039216 | 4.74E-04    | SRC, PTPN22, TYMS, PTGS2, PIK3CG, PTGS1, LGALS3,  | 0.00811  |
| GOTERM_CC_DIRECT | GO:0043235~receptor complex             | 5  | 9.803921569 | 0.001900383 | RET, KDR, PPARG, MET, ADRA2A                      | 0.028928 |
| GOTERM_CC_DIRECT | GO:0016323~basolateral plasma membra    | 5  | 9.803921569 | 0.002696132 | HSP90AA1, CA2, TLR9, CD38, ADRA2A                 | 0.035673 |
| GOTERM_MF_DIRECT | GO:0004175~endopeptidase activity       | 6  | 11.76470588 | 3.34E-06    | MMP12, MMP13, MMP2, KLK3, MMP8, MMP9              | 7.46E-04 |
| GOTERM_MF_DIRECT | GO:0004672~protein kinase activity      | 9  | 17.64705882 | 6.32E-06    | RET, SRC, PRKCB, PRKCD, MAPK14, MET, MAP3K14, PI  | 7.46E-04 |
| GOTERM_MF_DIRECT | GO:0005518~collagen binding             | 5  | 9.803921569 | 3.14E-05    | MMP12, ACHE, MMP13, FN1, MMP9                     | 0.002466 |
| GOTERM_MF_DIRECT | GO:0019903~protein phosphatase bindin   | 5  | 9.803921569 | 1.07E-04    | LGALS3, HSP90AA1, PPARG, MAPK14, MET              | 0.006317 |
| GOTERM_MF_DIRECT | GO:0004252~serine-type endopeptidase    | 6  | 11.76470588 | 1.55E-04    | MMP12, MMP13, MMP2, KLK3, MMP8, MMP9              | 0.007317 |

---

|                  |                                          |    |             |          |                                               |          |
|------------------|------------------------------------------|----|-------------|----------|-----------------------------------------------|----------|
| GOTERM_MF_DIRECT | GO:0004714~transmembrane receptor pr     | 5  | 9.803921569 | 2.51E-04 | RET, SRC, PRKCD, KDR, MET                     | 0.009037 |
| GOTERM_MF_DIRECT | GO:0004222~metalloendopeptidase activi   | 5  | 9.803921569 | 2.68E-04 | MMP12, MMP13, MMP2, MMP8, MMP9                | 0.009037 |
| GOTERM_MF_DIRECT | GO:0008270~zinc ion binding              | 10 | 19.60784314 | 4.26E-04 | MMP12, CA1, MMP13, CA2, PRKCB, MMP2, ALB, PPA | 0.011172 |
| GOTERM_MF_DIRECT | GO:0016702~oxidoreductase activity, acti | 3  | 5.882352941 | 5.27E-04 | ALOX5, PTGS2, PTGS1                           | 0.011172 |
| GOTERM_MF_DIRECT | GO:0019899~enzyme binding                | 7  | 13.7254902  | 5.53E-04 | SRC, PRKCD, FN1, PPARG, LGALS9, MAPK14, PTGS2 | 0.011172 |

---
