# Supplementary material
Source: PubMed Central journal article supplement (PMC10226406)
Supplement: PR72_235_tableS4.pdf [file PR72_235_tableS4.pdf]

**Table S4.** The top 10 hub targets of the PPI network

| <b>Protein names</b>                             | <b>Gene name</b> |
|--------------------------------------------------|------------------|
| MAP kinase p38 alpha                             | MAPK14           |
| Arachidonate 5-lipoxygenase                      | ALOX5            |
| Thymidine phosphorylase                          | TYMP             |
| Transforming protein p21/H-Ras-1                 | HRAS             |
| Peroxisome proliferator-activated receptor gamma | PPARG            |
| Caspase-3                                        | CASP3            |
| Carbonic anhydrase II                            | CA2              |
| Cyclooxygenase-2                                 | PTGS2            |
| Prostate-specific antigen                        | KLK3             |
| Carbonic anhydrase I                             | CA1              |
